# Supplementary material for: Freshwater pearl mussels from northern Sweden serve as long-term,high-resolution stream water isotope recorders
Source: Copernicus journal article supplement (doi:10.5194/hess-2019-337), 2019-07-29
Supplement: Supplementary file [file hess-2019-337-RC1-supplement.pdf]

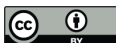

## Freshwater pearl mussels from northern Sweden serve as long-term, high-resolution stream water isotope recorders

Bernd R. Schöne<sup>1</sup>, Aliona E. Meret<sup>2</sup>, Sven M. Baier<sup>3</sup>, Jens Fiebig<sup>4</sup>, Jan Esper<sup>1</sup>, Jeffrey McDonnell<sup>5</sup>,  
5 Laurent Pfister<sup>6</sup>

<sup>1</sup>Institute of Geosciences, University of Mainz, Mainz, 55128, Germany

<sup>2</sup>Naturhistoriska riksmuseet, Stockholm, 114 18, Sweden

<sup>3</sup>Agilent Technologies Sales & Services GmbH & Co.KG, Frankfurt/M., 60528, Germany

<sup>4</sup>Institute of Geosciences, J.W. Goethe University, Frankfurt/M., 60438, Germany

10 <sup>5</sup>Global Institute for Water Security, University of Saskatchewan, Saskatoon, SK S7N 3H5, Canada

<sup>6</sup>Department 'Environmental Research and Innovation', Luxembourg Institute of Science and Technology, Belvaux, 4422, Grand-Duchy of Luxembourg

Correspondence to: Bernd R. Schöne (schoeneb@uni-mainz.de)

**Abstract.** The stable isotope composition of lacustrine sediments is routinely used to infer Late Holocene changes in  
15 precipitation over Scandinavia and ultimately, atmospheric circulation dynamics in the North Atlantic realm. However, such  
archives provide only low temporal resolution (ca. 15 years) precluding the ability to identify changes on inter-annual and  
quasi-decadal time-scales. Here we present a new, high-resolution reconstruction using shells of freshwater pearl mussels,  
*Margaritifera margaritifera*, from three rivers in north Sweden. We present seasonally to annually resolved, calendar-aligned  
20 stable oxygen and carbon isotope data from ten specimens covering the time interval of 1819 to 1998. The studied bivalves  
formed their shells near equilibrium with the oxygen isotope signature of ambient water and thus reflected hydrological  
processes in the catchment as well as changes, albeit damped, of the isotope value of local atmospheric precipitation. Shell  
oxygen isotopes were correlated significantly with the North Atlantic Oscillation index (up to 56 % explained variability)  
suggesting that moisture from which winter precipitation formed originated predominantly in the North Atlantic during NAO<sup>+</sup>  
25 years, but in the Arctic during NAO<sup>-</sup> years. The specific isotope signature of winter precipitation was damped in stream water  
and this effect was recorded by the shells. Shell stable carbon isotope values did not show consistent ontogenetic trends, but  
rather oscillated around an average that differed slightly among the studied rivers (ca. -12.00 to -13.00 ‰). Results of this  
study contribute to an improved understanding of climate dynamics in Scandinavia and the North Atlantic sector and can help  
to constrain ecological changes in riverine ecosystems. Moreover, long isotope records of precipitation and streamflow are  
30 pivotal for improving our understanding and modeling of hydrological, ecological, biogeochemical and atmospheric processes.  
Our new approach offers a much higher temporal resolution and superior dating control than existing archives.

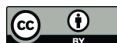

## 1 Introduction

Multi-decadal records of  $\delta^{18}\text{O}$  signals in precipitation and stream water are important for documenting climate change impacts on river systems (Rank et al., 2017), improving mechanistic understanding of water flow and quality controlling processes (Darling and Bowes, 2016) and testing earth hydrological and land surface models (Reckerth et al., 2017; Risi et al., 2016).  
35 However, the common sedimentary archives used for such purposes typically do not provide the required temporal resolution (e.g., Rosqvist et al., 2007). In such studies, the temporal changes in the oxygen isotope signatures of meteoric water are encoded in biogenic tissues and abiogenic minerals formed in rivers and lakes (e.g., Teranes et al. 2001; Leng & Marshall 2004). In fact, many studies have determined the oxygen isotope composition of diatoms, ostracods, authigenic carbonate and aquatic cellulose preserved in lacustrine sediments to reconstruct Late Holocene changes in precipitation over Scandinavia and  
40 ultimately, atmospheric circulation dynamics in the North Atlantic realm (e.g., Hammarlund et al., 2002; Andersson et al., 2010; Rosqvist et al., 2004, 2013). With their short residence times (Rosqvist et al., 2013), the small, hydrologically connected, through-flow lakes of northern Scandinavia are an ideal region for this type of study. Their isotope signatures – though damped in comparison to isotope signals in precipitation – directly respond to changes in precipitation isotope composition (Leng & Marshall 2004). However, even the highest available temporal resolution of such records (15 years per sample in sediments  
45 from Lake Tibetanus, Swedish Lapland; Rosqvist et al., 2007) is still insufficient to resolve inter-annual to decadal-scale variability, i.e., the time-scales at which the North Atlantic Oscillation (NAO) operates (Hurrell, 1995; Trouet et al., 2009). The NAO steers weather and climate dynamics in northern Scandinavia and determines the origin of air masses from which meteoric waters form. While sediment records are still of vital importance for century and millennial-scale variations, new approaches are needed for finer scale resolution on the 1–100-year time-scale.

50

One **new** approach for hydroclimate reconstruction is the use of freshwater mussels as natural stream water stable isotope recorders (Dettman et al., 1999; Kelemen et al., 2017; Pfister et al., 2018, 2019). Their shells can provide seasonally to annually resolved, chronologically precisely constrained records of environmental changes in the form of variable increment widths (= distance between subsequent growth lines) and geochemical properties (Nyström et al. 1996; Schöne et al. 2005a;  
55 Schöne and Krause, 2016; Geeza et al., in press a, b; Kelemen et al., in press). In particular, as almost all other bivalves, freshwater mussels form their shells near equilibrium with the oxygen isotope signature of the water in which they live (Dettman et al., 1999; Kaandorp et al. 2003; Versteegh et al. 2009; Kelemen et al., 2017). Freshwater pearl mussels, *Margaritifera margaritifera*, are particularly useful in this respect, because they can reach a lifespan of over 200 years (Ziuganov et al. 2000; Mutvei & Westermark 2001) offering an insight into long-term changes of freshwater ecosystems at  
60 unprecedented temporal resolution 

Here we present the first, absolutely dated, annually resolved stable oxygen and carbon isotope record of freshwater pearl mussels from three different rivers in northern Sweden covering nearly two centuries (1819–1998). We test the ability

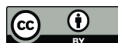

of these freshwater pearl mussels to reconstruct the NAO index and associated changes in precipitation provenance using shell  
65 oxygen isotope data ( $\delta^{18}\text{C}$ ). We evaluate how shell oxygen isotope data compares to  $\delta^{18}\text{O}$  of stream water ( $\delta^{18}\text{O}_w$ ) and  
precipitation ( $\delta^{18}\text{O}_p$ ) and how the latter two relate to each other. In addition, we explore the physical controls on shell stable  
carbon isotope signatures. We leverage past work in Sweden that has shown that the main growing season of *M. margaritifera*  
lasts from mid-May to mid-October, with fastest growth rates occurring between June and August (Dunca & Mutvei, 2001;  
70 Dunca et al. 2005; Schöne et al., 2004a, b, 2005a). We use changes in annual increment width of *M. margaritifera* to infer  
water temperature, because growth rates are faster during warm summers and result in broader increment widths (Schöne et  
al., 2004a, b, 2005a). Since specimens of a given population react similarly to changes in temperature, their average shell  
growth patterns can be used to estimate climate and hydrological change. Consequently, increment series of specimens with  
overlapping lifespans can be cross-dated and combined to form longer chronologies covering several centuries (Schöne et al.,  
2004a, b, 2005a).

75

## 2 Material and methods

Similar to other marine (Epstein et al. 1953; Mook & Vogel 1968; Killingley & Berger 1979) and freshwater bivalves (Dettman  
et al., 1999; Kaandorp et al. 2003; Versteegh et al. 2009; Pfister et al. 2019), *M. margaritifera* forms its shell near equilibrium  
with the oxygen isotope composition of the water ( $\delta^{18}\text{O}_w$ ) (Pfister et al. 2018; Schöne et al. 2005a). If the fractionation of  
80 oxygen isotopes between the water and shell carbonate is only temperature-dependent and the temperature during shell  
formation is known or can be otherwise estimated (e.g., from shell growth rate), reconstruction can be made of the oxygen  
isotope signature of the water from that of the shell ( $\delta^{18}\text{O}_s$ ). We collected ten specimens of the freshwater pearl mussel, *M.*  
*margaritifera* from three rivers in Norrland (Norrbottnens län), northern Sweden, ~~were used~~ (Fig. 1+2; Table 1). Bivalves were  
collected between 1993 and 1999 and included nine living specimens and one found dead and articulated (bi-valved; ED-GJ-  
85 D6R). Four individuals were taken from the river Nuortejaurbäcken (NJB), two from Grundträsktjärnbäcken (GTB) and four  
from Görjeån (GJ) (Fig. 1). Since *M. margaritifera* is an endangered species (Moorkens et al., 2018), we refrained from  
collecting additional specimens that could have covered the time interval since collection and manuscript preparation, but  
relied on material that we obtained – with permission – for a postdoctoral project of one co-author (AEM, formerly known as  
Elena Dunca) and the doctoral thesis of another co-author (SMB).

90

The bedrock in the studied catchments is dominated by orthogneiss and granodiorite. The vegetation at GTB (ca. 90 m a.s.l.  
[above sea-level]) and GJ (ca. 200 m a.s.l.) consisted of a mixed birch forest, while conifers, shrubs and bushes dominated at  
NJB (ca. 400 m a.s.l.). The studied rivers were thus rich in humin acids. The studied streams were fed by small upstream open  
(low-through) lakes.



## 95 2.1 Sample preparation

The soft parts were removed immediately after collection and shells were then dried from air. One valve of each specimen was wrapped in a protective layer of WIKO metal epoxy resin #5 and mounted to a Plexiglas cube using Gluetec Multipower plastic welder #3. Shells were then cut perpendicular to the growth lines using a low-speed saw (Buehler Isomet) equipped with a diamond-coated (low-diamond concentration) wafering thin blade (400  $\mu\text{m}$  thickness]. One specimen (ED-NJB-A3R) was cut along the longest axis, all others along the height axis from the umbo to the ventral margin (Fig. 2). From each specimen, two ca. 3 mm-thick shell slabs were obtained and mounted onto glass slides with the mirroring sides. The latter facilitated the temporal alignment of isotope data measured in one slab to growth patterns determined in the other slab. The shell slabs were ground on glass plates using suspensions of 800 and 1200 grit SiC powder and subsequently polished with  $\text{Al}_2\text{O}_3$  powder (grain size: 1  $\mu\text{m}$ ) on a Buehler G-cloth. Between each grinding step and after polishing, the shell slabs were ultrasonically cleaned with water.

## 2.2 Shell growth pattern analysis

For growth pattern analysis, one polished shell slab was immersed in Mutvei's solution for 20 min at 37-40° C under constant stirring (Schöne et al., 2005b). After careful rinsing in demineralized water, the stained sections were air-dried under a fume hood. Dyed thick-sections were then viewed under a binocular microscope (Olympus SZX16) equipped with sectoral dark field illumination (Schott VisiLED MC1000) and photographed with a Canon EOS 600D camera (Fig. 2b). The widths of the annual increments were determined to the nearest  $\pm 1 \mu\text{m}$  with the image processing software (Panopea, © Peinl and Schöne). Measurements were completed in the outer portion of the outer shell layer (oOSL, prismatic ultrastructure) from the boundary between the oOSL and the inner portion of the outer shell layer (iOSL, nacreous ultrastructure) perpendicularly to the previous annual growth line (Fig. 2c). Annual increment width chronologies were detrended with stiff cubic spline functions and standardized to produce dimensionless measures of growth (standardized growth indices, SGI values) following standard sclerochronological methods (Helama et al., 2006; Butler et al., 2013; Schöne, 2013). Due to low heteroscedasticity, no variance correction was needed (Frank et al., 2007).

## 2.3 Stable isotope analysis

The other polished shell slab of each specimen was used for stable isotope analysis. To avoid contamination of the shell aragonite powders (Schöne et al., 2016), the cured epoxy resin and the periostracum were completely removed prior to sampling. A total of 1,551 powder samples (32-128  $\mu\text{g}$ ) were obtained from the oOSL by means of micromilling under a stereomicroscope at 160 x magnification. An equidistant sampling strategy was applied, i.e., within each annual increment the milling step size was held constant (Schöne et al., 2005c). We used a cylindrical, diamond-coated drill bit (1 mm diameter; Komet/Gebr. Brasseler GmbH and Co. KG, model no. 835 104 010) mounted on a Rexim Minimo drill. While the drilling device was affixed to the microscope, the sample was handheld during sampling early ontogenetic years, up to 16 samples



were obtained between successive annual growth lines. In the latest ontogenetic portions of specimens ED-NJB-A2R (last year of life) and ED-GJ-D6R (last nine years of life), each isotope sample represented two to three years.

Stable carbon and oxygen isotopes were measured at the Institute of Geosciences at the University of Frankfurt/Main (Germany). Carbonate powder samples were digested in He-flushed borosilicate exetainers at 72 °C using a water-free phosphoric acid. The released CO<sub>2</sub> gas was then measured in continuous flow mode with a ThermoFisher MAT 253 gas source isotope ratio mass spectrometer coupled to a GasBench II. Stable isotope ratios were corrected against an NBS-19 calibrated Carrara marble ( $\delta^{13}\text{C} = +2.02\text{‰}$ ;  $\delta^{18}\text{O} = -1.76\text{‰}$ ). Results are expressed as parts per thousand (‰) relative to the Vienna Pee Dee Belemnite (V-PDB). The long-term accuracy based on blindly measured reference materials with known isotopic composition is better than 0.05 ‰ for both isotope systems. Note that no correction was applied for differences in fractionation factors of the reference material (calcite) and shells (aragonite), because the paleothermometry equation used below (Eq. 2) did not consider these differences as well (Füllenbach et al., 2015). However, the correction of ca. -0.38 ‰ would be required if  $\delta^{18}\text{O}$  values of shells and other carbonates were compared with each other.

#### 2.4 Instrumental data sets

Shell growth and isotope data were compared to a set of environmental variables including the station-based winter (DJF) NAO index (obtained from <https://climatedataguide.ucar.edu>, last access: 9 April 2019) as well as oxygen isotope values of river water ( $\delta^{18}\text{O}_w$ ) and weighted (corrected for precipitation amounts) oxygen isotope values of precipitation ( $\delta^{18}\text{O}_p$ ). Data on monthly river water and precipitation came from the Global Network of Isotopes in Precipitation (GNIP) and Rivers (GNIR), available at the International Atomic Energy Agency from their website at <https://nucleus.iaea.org/wiser/index.aspx> (last access: 1 April 2019). Furthermore, monthly air temperature ( $T_a$ ) data came from the station Stensele, available at the Swedish Meteorological and Hydrological Institute (<https://www.smhi.se>). From these data, monthly river water temperature ( $T_w$ ) was computed by using the summer air-river water temperature conversion by Schöne et al. (2004a), Eq. (1):

$$T_w = 0.8844 \times T_a - 0.8606. \quad (1)$$

#### 2.5 Weighted annual shell isotope data

Since shell growth rate varied during the growing season with fastest biomineralization rates occurring during June and July (Dunca et al., 2005), annual growth increments are biased toward summer, and powder samples taken from the shells at equidistant intervals represent different amounts of time. To compute growing season averages (henceforth referred to as ‘annual averages’) from such intra-annual shell isotope data ( $\delta^{18}\text{O}_s$ ,  $\delta^{13}\text{C}_s$ ), weighted (henceforth denoted with an asterisk) annual means are thus needed, i.e.,  $\delta^{18}\text{O}_s^*$  and  $\delta^{13}\text{C}_s^*$  (Schöne et al., 2004a). The relative proportion of time of the growing season represented by each isotope sample was computed from a previously published intra-annual growth curve of juvenile *M. margaritifera* from Sweden (Dunca et al., 2005). For example, if four isotope samples were taken between two winter lines



at equidistant intervals, the first sample would represent 22.38 % of the time of the main growing season duration, the second, third and fourth 20.28, 24.47 and 32.87 %, respectively (Table 2). Accordingly, the weighted annual mean isotope values ( $\delta^{18}\text{O}_s^*$ ,  $\delta^{13}\text{C}_s^*$ ) were calculated by multiplying these numbers (= weights) with the respective  $\delta^{18}\text{O}_s$  and  $\delta^{13}\text{C}_s$  values and dividing the sum of the products by 100. The four isotope samples of the example above comprise the time intervals of 23 May–22 June, 23 June–21 July, 22 July–25 August, and 26 August–12 October, respectively. Missing isotope data due to lost powder, machine error, air in the exetainer etc. were filled in by linear interpolation in 20 instances. We assumed that the timing and rate of seasonal growth remained nearly unchanged throughout lifetime of the specimens and in the study region (see also Sect. 4).

## 2.6 Reconstruction of oxygen isotope signatures of river water on annual and intra-annual time-scales

To assess how well the shells recorded  $\delta^{18}\text{O}_w$  on inter-annual time-scales, the stable oxygen isotope signature of river water ( $\delta^{18}\text{O}_{wr}^*$ ) during the main growing season ('annual'  $\delta^{18}\text{O}_{wr}^*$ ) was reconstructed from  $\delta^{18}\text{O}_s^*$  data and the arithmetic average of (monthly) river water temperatures,  $T_w$ , during the same time interval, i.e., 23 May–12 Oct. Through this approach, the temperature-dependent oxygen isotope fractionation was removed from the  $\delta^{18}\text{O}_s^*$  data. For this purpose, the paleothermometry equation of Grossman and Ku (1986; corrected for the VPDB-VSMOW scale difference following Gonfiantini et al., 1995) was solved for  $\delta^{18}\text{O}_{wr}^*$ , Eq. (2):

$$\delta^{18}\text{O}_{wr}^* = \frac{19.43 - 4.34 \times \delta^{18}\text{O}_s^* - T_w}{-4.34} \quad (2)$$

175

Since air temperature data were only available from 1860 onward,  $T_w$  prior to that time were inferred from age-detrended and standardized annual growth increment data (SGI) using a linear regression model similar to that introduced by Schöne et al. (2004a). In the revised model, SGI data of 25 shells from northern Sweden (fifteen published chronologies, provided in the two articles cited above, and ten new chronologies from the specimens studied in the present paper) were regressed against weighted annual water temperature, henceforth referred to as annual  $T_w^*$ . The annual  $T_w^*$  data consider variations in seasonal shell growth rate. 6.29, 25.49, 24.52, 21.92, 16.88 and 4.90 % of the annual growth increment were formed in each month from May to October, respectively. The values were multiplied with  $T_w$  of the corresponding month and the sum of the products divided by 100 to obtain annual  $T_w^*$  data. The revised shell growth vs. temperature model is as follows, Eq. (3):

185

$$T_w^* = 1.45 \times SGI + 8.42. \quad (3)$$



For coherency purposes, we also applied this model to post-1859 SGI values and computed river water temperatures that were subsequently used to estimate  $\delta^{18}\text{O}_{\text{wr(SGI)}}$ .

190

To assess how well the shells recorded  $\delta^{18}\text{O}_{\text{w}}$  at intra-annual time-scales, we focused on two shells from NJB (ED-NJB-A4R and ED-NJB-A6R), which provided the highest isotope resolution of ~~ca.~~ one to two weeks per sample during the few years of overlap with GNIP and GNIR data. Note, only for this bivalve sampling locality, monthly instrumental oxygen isotope data were available from the GNIP and GNIR data sets (data by Burgman et al., 1981). The  $\delta^{18}\text{O}_{\text{w}}$  data were measured in the river Skellefteälven near Slagnäs, ca. 40 km SW of NJB (65°34'59.50"N, 18°10'39.12"E) and covered the time interval of 1973-1980. The  $\delta^{18}\text{O}_{\text{p}}$  data came from Racksund (66°02'60.00"N, 17°37'60.00"E; ca. 75 km NW of NJB) and covered the time interval of 1975–1979. Since precipitation amounts were not available from Racksund, we computed average monthly precipitation amounts from data recorded at Arjeplog (66°02'60.00"N, 17°53'60.00"E) during 1961–1967. Arjeplog is located ca. 65 km NW of NJB and ca. 12 km W of Racksund. Equation (2) was used to calculate  $\delta^{18}\text{O}_{\text{wr}}$  from individual  $\delta^{18}\text{O}_{\text{s}}$  and water temperature that existed during the time when the respective shell portion was formed. Intra-annual water temperatures were computed as weighted averages,  $T_{\text{w}}$ , from monthly  $T_{\text{w}}$  considering seasonal changes of the shell growth rate. For example, if four powder samples were taken from the shell at equidistant intervals within one annual increment, 6.29 % of the first sample were formed in May and 18.63 % in June (sum ca. 25 %). The average temperature during that time interval is computed with these numbers as follows: ( $T_{\text{w}}$  of May  $\times$  0.0629 +  $T_{\text{w}}$  of June  $\times$  0.1863) / 25. 6.86 % of the second sample from that annual increment formed in June and 17.97 % in July. Accordingly, the average temperature was: ( $T_{\text{w}}$  of June  $\times$  0.0686 +  $T_{\text{w}}$  of July  $\times$  0.1747) / 25 etc. Note that annual  $\delta^{18}\text{O}_{\text{wr}}$  can also be computed from intra-annual  $\delta^{18}\text{O}_{\text{wr}}$ , but this approach is much more time-consuming and complex than the method described further above. Yet, both methods produce nearly identical results.

205

205

## 2.7 Stable carbon isotopes of the shells

Besides the winter and summer NAO index, weighted annual stable carbon isotope data of the shells,  $\delta^{13}\text{C}_{\text{s}}$ , were compared to shell growth data (SGI chronologies). Since the  $\delta^{13}\text{C}_{\text{s}}$  could potentially be influenced by ontogenetic effects, the chronologies were detrended and standardized ( $\delta^{13}\text{C}_{\text{s(d)}}$ ) following methods typically used to remove ontogenetic age trends from annual increment width chronologies (see e.g., Schöne, 2016). Detrending was accomplished with cubic spline functions capable of removing any directed trend toward higher or lower values through lifetime.

## 215 3 Results

The lengths of the annual increment chronologies of *M. margaritifera* from the three studied rivers (Nuortejaurbäcken, Grundträsktjärnbäcken and Görjeån) ranged from 21 to 181 years and covered the time interval of 1819 to 1999 AD (Table 1). Since the umbonal shell portions were deeply corroded and the outer shell layer was missing – a typical feature of long-lived



freshwater bivalves (Schöne et al., 2004a; Fig 2a) – the actual ontogenetic ages of the specimens could not be determined and  
220 may have been up to 10 years higher than listed in Table 1.

### 3.1 Shell growth and temperature

The ten new SGI series from NJB, GTB and GJ were combined with fifteen published annual increment series of *M. margaritifera* from the rivers Pärälven, Päriskalsbäcken and Bölsmanån (Schöne et al., 2004a, b, 2005) to a revised Norrland  
225 master chronology. During the 50-year calibration interval of 1926–1975 (the same time interval was used in the previous  
study by Schöne et al., 2004 a, b, 2005), the chronology was significantly ( $p < 0.05$ ) and positively correlated ( $R = 0.74$ ;  $R^2 =$   
 $0.55$ ) to the weighted annual river water temperature ( $T_w^*$ ) during the main growing season (Fig. 3). A somewhat stronger  
correlation was found when the four specimens from GJ were omitted ( $R^2 = 0.63$ ). These values were similar to the previously  
published coefficient of determination for a stacked record using *M. margaritifera* specimens from rivers across whole Sweden  
( $R^2 = 0.60$ ; note that this number is for SGI vs. an arithmetic annual  $T_w$ ; a regression of SGI against weighted annual  $T_w$  returns  
230 an  $R^2$  of 0.64).

### 3.2 Shell stable oxygen isotope data

The shell oxygen isotope curves showed distinct seasonal and inter-annual variations (Fig. 4+5). The former were particularly  
well developed in specimens from GTB and NJB (Fig. 4), which were sampled with a very high spatial resolution of ca. 30  
 $\mu\text{m}$  (ED-GTB-A1R, ED-GTB-A2R, ED-NJB-A4R, ED-NJB-A6R). In these shells, up to 16 samples were obtained from single  
235 annual increments translating into a temporal resolution of ~~ca.~~ one to two weeks per sample. Typically, the highest  $\delta^{18}\text{O}_s$  values  
of each cycle occurred at the winter lines and lowest values about half way between consecutive winter lines (Fig. 4). Largest  
seasonal  $\delta^{18}\text{O}_s$  amplitudes of ca. 2.20 ‰ were measured in specimens from GTB (-8.68 to -10.91 ‰) and ca. 1.70 ‰ in shells  
from NJB (-8.63 to -10.31 ‰).

240 Weighted annual shell oxygen isotope ( $\delta^{18}\text{O}_s^*$ ) values fluctuated on decadal time-scales (major common period: ca. 8 years)  
with amplitudes larger than those occurring on seasonal scales, i.e., ca. 2.50 and 3.00 ‰ in shells from NJB (-8.63 to -11.10  
‰) and GBT (-7.84 to -10.85 ‰), respectively (Fig. 5a+b). The ~~long~~ chronologies from GJ also revealed a century-scale  
variation with minima in the 1820s and 1960s and maxima in the 1880s and 1990s (Fig. 5c).  $\delta^{18}\text{O}_s^*$  curves of specimens from  
the same locality showed notable agreement in terms of absolute values and visual agreement (running similarity), specifically  
245 specimens from NJB and GTB (Fig. 5a+b). However, the longest chronology from GJ showed only little agreement with the  
remaining three series from that site (Fig 5c). The similarity among the series also changed through time (Fig 5a-c). In some  
years, the difference between the series was less than 0.20 ‰ at NJB ( $N = 4$ ) and GTB ( $N = 2$ ) (1983) and 0.10 ‰ at GJ (1953;  
 $N = 4$ ), whereas in other years, differences varied by up to 0.82 ‰ at NJB and 1.00 ‰ at GTB and GJ, respectively. Average  
shell oxygen isotope chronologies of the three studied rivers exhibited a strong running similarity (passed the





250 ‘Gleichläufigkeitstest’ by Baillie and Pilcher, 1983, for  $p < 0.001$ ) and were significantly positively correlated to each other  
( $R^2$  values of NJB vs GTB = 0.34, NJB vs GJ = 0.40 and GTB vs GJ = 0.36; all at  $p < 0.0001$ ).

### 3.3 Shell stable oxygen isotope data and instrumental records

At NJB – the only bivalve sampling site for which measured stream water isotope data were available from nearby localities  
– May–Oct ranges of reconstructed and instrumental stream water  $\delta^{18}\text{O}$  between 1973 and 1980 (without 1977 because missing  
255  $\delta^{18}\text{O}_w$ ) were in close agreement (shells: 1.95 ‰ vs. stream water: 1.85 ‰; Fig. 6a). During the same time interval, arithmetic  
means of the shells were  $-12.48 \pm 0.29$  ‰ (ED-NJB-A6R) and  $-12.42 \pm 0.34$  ‰ (ED-NJB-A4R), whereas the stream water  
measured  $-12.33 \pm 0.39$  ‰. Corresponding median values equaled  $-12.37 \pm 0.36$  ‰ (ED-NJB-A6R),  $-12.30 \pm 0.32$  ‰ (ED-  
NJB-A4R), and  $-12.39 \pm 0.30$  ‰ (stream water). Also, the inter-annual trends of  $\delta^{18}\text{O}_{wr}^*$  and  $\delta^{18}\text{O}_w$  were similar (Fig. 6a):  
Values declined by ca. 1.00 ‰ between 1973 and 1977 followed by a slight increase of ca. 0.50 ‰ until 1980. In contrast to  
260 the ~~data~~ stream water signal (average seasonal range during four years for both which stream water and precipitation data  
were available [1975, 1976, 1978, 1979]:  $-1.50 \pm 0.57$  ‰), ~~oxygen isotopes in precipitation~~ exhibited much stronger  
fluctuations on seasonal (on average,  $-9.37 \pm 2.81$  ‰; extreme values of ca.  $-4.00$  and  $-18.00$  ‰; Fig. 6b) and inter-annual  
time-scales. The means (medians) of  $\delta^{18}\text{O}_w$  and  $\delta^{18}\text{O}_p$  were  $-12.59 \pm 0.33$  ‰ ( $-12.60 \pm 0.37$  ‰) and  $-12.53 \pm 1.05$  ‰ ( $-12.70$   
 $\pm 1.43$  ‰), respectively.

265 Despite the limited number of instrumental data, seasonally averaged  $\delta^{18}\text{O}_{wr}^*$  data agreed reasonably well with  $\delta^{18}\text{O}_w$  and  
weighted  $\delta^{18}\text{O}_p$  data (corrected for precipitation amounts), respectively, both in terms of correlation coefficients and absolute  
values (Table 3); these findings were corroborated by the regression analyses of instrumental  $\delta^{18}\text{O}_p$  against  $\delta^{18}\text{O}_w$  (Table 3).  
For example, the oxygen isotope values of summer (June–Sep) precipitation were significantly ( $p < 0.05$ ) and positively  
270 correlated to those of shell carbonate precipitated during the same time interval (95 % explained variability in specimen ED-  
NJB-A6R, and 97 % in specimen ED-NJB-A4R). Likewise, oxygen isotope values in river water and precipitation during  
summer were positively correlated to each other, though less significant ( $p = 0.097$ ). Statistically significant relationships were  
also found for  $\delta^{18}\text{O}_{wr}^*$  and  $\delta^{18}\text{O}_w$  during the main growing season as well as annual  $\delta^{18}\text{O}_{wr}^*$  and Dec-Sep  $\delta^{18}\text{O}_p$ . The  
underlying assumption for the latter was that the  $\delta^{18}\text{O}_{wr}^*$  average reflects the combined  $\delta^{18}\text{O}_p$  of snow precipitated during the  
275 last winter (received as meltwater during spring) and rain precipitated during summer. Instrumental data supported this  
hypothesis, because stream water  $\delta^{18}\text{O}$  during the main growing season was highly significantly and positively correlated to  
Dec-Sep  $\delta^{18}\text{O}_p$ . On the other hand, changes of the isotope signal of winter (Dec–Feb) snow were only weakly and not  
significantly resembled by changes in river water oxygen isotopes during the snowmelt (May–June) or  $\delta^{18}\text{O}_{wr}^*$  in shell portions  
formed during that time interval (Table 3). During the four years under study (1975, 1976, 1978, 1979), measured and  
280 reconstructed ~~stream water  $\delta^{18}\text{O}$~~  were nearly identical during the main growing season ( $\delta^{18}\text{O}_w = -12.46$  ‰;  $\delta^{18}\text{O}_{wr}^* = -12.57$   
‰ and  $-12.46$  ‰) and during summer ( $\delta^{18}\text{O}_w = -12.39$  ‰;  $\delta^{18}\text{O}_{wr}^* = -12.46$  ‰ and  $-12.20$  ‰) (Table 3). In contrast, isotopes  
in precipitation and river water showed larger discrepancies (see ~~further~~ above and Fig. 6b, Table 3).



### 3.4 Shell stable oxygen isotope data and synoptic circulation patterns (NAO)

Site-specific annual  $\delta^{18}\text{O}_{\text{wr}}^*$  (and  $\delta^{18}\text{O}_{\text{wr}(\text{SGI})}^*$ ) chronologies (computed as arithmetic averages of all chronologies at a given river) were significantly ( $p < 0.05$ ) positively correlated to NAO indices (Fig. 7; Table 4). In NAO<sup>+</sup> years, the  $\delta^{18}\text{O}_{\text{wr}}^*$  (and  $\delta^{18}\text{O}_{\text{wr}(\text{SGI})}^*$ ) values were higher than during NAO<sup>-</sup> years. The strongest correlation existed between the winter (Dec-Mar) NAO and  $\delta^{18}\text{O}_{\text{wr}}^*$  (and  $\delta^{18}\text{O}_{\text{wr}(\text{SGI})}^*$ ) at NJB (44 to 49 % explained variability). At GTB, the explained variability ranged between 24 and 27 %, whereas at GJ only 16 to 18 % of the inter-annual  $\delta^{18}\text{O}_{\text{wr}}^*$  (and  $\delta^{18}\text{O}_{\text{wr}(\text{SGI})}^*$ ) variability was explained by the winter NAO index. Between 1947 and 1991, the time interval for which isotope data were available for all sites,  $R^2$  values were more similar to each other and ranged between 0.27 and 0.46 (Table 4). All sites reflected well-known features of the instrumental NAO index series such as the recent (1970-2000) positive shift toward a more dominant winter NAO, which delivered isotopically more positive winter precipitation to our region of interest (Fig. 7a-c). The correlation between  $\delta^{18}\text{O}_{\text{wr}}^*$  (and  $\delta^{18}\text{O}_{\text{wr}(\text{SGI})}^*$ ) and the summer (June-Aug) NAO index was much lower than for the winter NAO, but likewise positive and sometimes significant at  $p < 0.05$  (Table 4). Between 1947 and 1991, 7 to 16 % of the inter-annual oxygen isotope variability was explained by the summer NAO index.

We have also computed an average  $\delta^{18}\text{O}_{\text{wr}}^*$  curve for the entire study region (Fig. 8a-c). Since the level (absolute values) of the three rivers differed from other (average  $\delta^{18}\text{O}_{\text{wr}}^*$  of NJB, GTB and GJ during 1947–1992 were -12.51, -12.21 and -14.16 ‰, respectively), the series were standardized and then arithmetically averaged. The resulting chronology,  $\delta^{18}\text{O}_{\text{wr}(\text{Norrland})}^*$ , was strongly positively correlated to the winter NAO index (56 % explained variability; Fig. 8a). Despite the limited instrumental dataset,  $\delta^{18}\text{O}$  of river water and precipitation were likewise strongly positively correlated to the winter NAO index ( $R^2$  values of 0.72 and 0.84, respectively; Fig. 8d+e).

### 3.5 Shell stable carbon isotope data

Shell stable carbon isotope ( $\delta^{13}\text{C}_s$ ) data showed less distinct seasonal variations than  $\delta^{18}\text{O}_s$ , but highest values were often also associated with the winter lines and lowest values occurred between subsequent winter lines (Fig. 4). Largest seasonal amplitudes of ca. 3.90 ‰ were observed in specimens from NJB (-8.21 to -12.10 ‰) and ca. one per mil smaller ranges at GTB (-10.97 to -13.88 ‰).

Weighted annual  $\delta^{13}\text{C}_s^*$  curves varied greatly from each other in terms of change through lifetime among localities and even at the same locality (Fig. 5d-f). Note that all curves started in early youth (below the age of ten), except ED-GJ-A1L and ED-GJ-A3L which began only at a minimum age of 25 and 29, respectively (Table 1). Whereas two specimens from NJB (ED-NJB-A6R, ED-NJB-A4R) showed strong ontogenetic  $\delta^{13}\text{C}_s^*$  trends from ca. -8.70 to -12.50 ‰, weaker trends toward more negative values were observed in ED-NJB-A2R (ca. -10.00 to -11.70 ‰) and shells of GTB (ca. -11.50 to -13.00 ‰). Opposite ontogenetic trends occurred in ED-GJ-A1L and ED-GJ-A2R (ca. -15.00 to -12.00 ‰), but no trends at all were found



315 in ED-NJB-A3R, ED-GJ-A3L and ED-GJ-D6R (fluctuations around -12.00 ‰). All curves were also overlain by some decadal  
variability (typical periods of 3-6 and 13-16, 60-80 years). Even after detrending and standardization (Fig. 5g-i), no statistically  
significant correlation at  $p < 0.05$  was found between average  $\delta^{13}\text{C}_{\text{s(d)}}$ \* curves of the three sites (NJB-GTB:  $R = -0.11$ ,  $R^2 =$   
0.01; NJB-GJ:  $R = -0.17$ ,  $R^2 = 0.03$ ; GTB-GJ:  $R = 0.10$ ,  $R^2 = 0.01$ ). However, at each site, individual curves revealed reasonable  
visual agreement, specifically at NJB and GTB (Fig. 5g+h). At GJ, the agreement was largely limited to the low frequency  
320 oscillations (Fig. 5i).

The detrended and standardized annual shell stable carbon isotope ( $\delta^{13}\text{C}_{\text{s(d)}}$ ) curves showed little to no statistically significant  
( $p < 0.05$ ) agreement with the NAO indices or shell growth rate (SGI values) (Fig. 7; Table 4). A statistically significant, weak  
negative correlation (10 % explained variability) only existed between  $\delta^{13}\text{C}_{\text{s(d)}}$ \* and the winter NAO at NJB. Some visual  
325 agreement was apparent between  $\delta^{13}\text{C}_{\text{s(d)}}$  and SGI in the low frequency realm. For example, at NJB, faster growth during the  
mid-1950s, 1970s, 1980s and 1990s fell together with lower  $\delta^{13}\text{C}_{\text{s(d)}}$  values (Fig. 7g). Likewise at GTB, faster shell growth  
seemed to be inversely linked to  $\delta^{13}\text{C}_{\text{s(d)}}$  values (Fig. 7h).

#### 4 Discussion

##### 4.1 On the benefits of freshwater pearl mussels for stream water $\delta^{18}\text{O}$ reconstruction

330 Our results have shown that shells of freshwater pearl mussels from rivers in northern Scandinavia (fed predominantly by  
small, open lakes and precipitation) can serve as a long-term, high-resolution archive of the stable oxygen isotope signature of  
the water in which they lived. With these data are damped relative to precipitation (a result of the water transit times through  
the catchment of the stream), the observed and reconstructed stream water isotope signal mirror the seasonal and inter-annual  
variability in  $\delta^{18}\text{O}_\text{p}$ . The NAO and subsequent atmospheric circulation patterns determine the origin of air masses and the  $\delta^{18}\text{O}$   
335 signal in precipitation.

Compared to lake sediments, which have been used for similar reconstructions at nearby localities (e.g., Hammarlund  
et al., 2002; Andersson et al., 2010; Rosqvist et al., 2004, 2013), the new archive comes with a number of advantages.

340 (1) The effect of temperature-dependent oxygen isotope fractionation can be removed from  $\delta^{18}\text{O}_\text{s}$  so that the stable  
oxygen isotope signature of the water in which the bivalves lived can be computed. This is possible, because the  
water temperature during shell growth can be reconstructed from shell growth data or instrumental air  
temperature. Similar studies using lake sediments, however, merely relied on estimates of temperature variability  
during the formation of diatoms, ostracods etc., and how these temperatures changes affect reconstructions of  
345  $\delta^{18}\text{O}_\text{w}$  (e.g., Rosqvist et al., 2013). Noteworthy, in some of these archives (diatoms), the effect of temperature on  
the fractionation of oxygen isotopes between the skeleton and the ambient water is still debated (Leng, 2006).



350  *M. margaritifera* precipitates its shell near oxygen isotopic equilibrium with the ambient water, and shell  $\delta^{18}\text{O}$  reflects stream water  $\delta^{18}\text{O}$ . This may not be the case in all archives, which have previously been used. For example, ostracods possibly exhibit vital effects (Leng and Marshall, 2004). 

355 (3) The shells can provide seasonally to inter-annually resolved data. In the present study, each powder sample typically represented as little as one week up to one full growing season (= one 'year'; mid-May to mid-October; Dunca et al., 2005). In very slow growing shell portions of ontogenetically old specimens, individual samples occasionally covered two or, in exceptional cases, three years of growth which resulted in a reduction of variance. A refined sampling strategy and computer-controlled micromilling could ensure that time-averaging consistently remains below one year.

360 (4) Each sample taken from the shells can be placed in a precise temporal context. The very season and exact calendar year during which the respective shell portion formed can be determined in shells of specimens with known dates of death based on the seasonal growth curve and annual increment counts. Existing studies suffer from the disadvantage that time cannot be precisely constrained, neither at seasonal nor annual time-scales (unless varved sediments are available). Isotope results can be biased toward a particular season of the year or a specific years within a decade.

365  The specific sampling method based on micromilling produced uninterrupted isotope chronologies, i.e., no shell portion of the outer shell layer remained un-sampled. Due to the high temporal resolution, bivalve shell-based isotope chronologies can provide insights into inter-annual and decadal-scale paleoclimatic variability. Furthermore, it becomes possible to test hypotheses brought forward in previous studies according to which  $\delta^{18}\text{O}$  signatures of meteoric water are controlled by the winter and/or summer NAO (e.g., Rosqvist et al., 2007, 2013).  
370

375  In contrast to bivalve shells, sedimentary archives come with a much coarser temporal resolution. Each sample taken from sediments typically represents the average of several years, and the specific season and calendar year during which the ostracods, diatoms, authigenic carbonates etc. grew remains unknown. On the other hand, the time intervals covered by sedimentary archives are much larger and can reveal century and millennial-scale variations with much less effort than sclerochronology-based records. As such, the two types of archives could complement each other perfectly and increase the understanding past climatic variability.



#### 4.2 *M. margaritifera* $\delta^{18}\text{O}$ reflects stream water $\delta^{18}\text{O}$

Unfortunately, complete records of isotope data of the studied rivers were not available. Such data were required for a direct  
380 comparison with those acquired from shells ( $\delta^{18}\text{O}_{\text{wr}}^*$ ) and to determine if the shells were precipitated near oxygen isotopic  
equilibrium with the ambient water. However, one of the study localities (NJB) is located close to the river Skellefteälven, in  
which  $\delta^{18}\text{O}_{\text{w}}$  was irregularly determined between 1973 and 1980 (Fig. 6a) within the framework of the Water Resources  
Program (WRP). The WRP was jointly lead by the International Atomic Energy Agency and the World Meteorological  
385 Organization and aimed to complement the GNIP data set with respective isotope data from rivers worldwide (GNIR). It should  
be noted that the  $\delta^{18}\text{O}_{\text{w}}$  data of GNIR merely reflect temporal snapshots, but not actual monthly averages. In fact, the isotope  
signature of meteoric water can vary significantly on short time-scales (e.g., Darling, 2004; Leng and Marshall 2004; Rodgers  
et al., 2005). In addition, for some months, no GNIR data were available. In contrast, shell isotope data represent changes in  
the isotope composition of the water over coherent time intervals ranging from one week to one year (and in few cases two or  
three years). Due to the specific sampling technique (micromilling), uninterrupted shell oxygen isotope time-series were  
390 available. It is thus surprising how well the ranges of intra-annual  $\delta^{18}\text{O}_{\text{wr}}^*$  data compared to instrumental oxygen isotope data  
of the river Skellefteälven (Fig. 6a), and that summer averages as well as growing season averages of shells and GNIR were  
nearly identical (Table 3). Furthermore, in each studied river, individual  $\delta^{18}\text{O}_{\text{wr}}^*$  series agreed strongly with each other (Fig.  
5). All these aspects strongly suggest that shell formation occurred near equilibrium with the oxygen isotope composition of  
the ambient water, and *M. margaritifera* recorded changes of stream water  $\delta^{18}\text{O}$ . The conclusions are in agreement with  
395 previously published results from various different freshwater mussels (e.g., Dettman et al., 1999; Kaandorp et al. 2003;  
Versteegh et al., 2009) and numerous marine bivalves (e.g., Epstein et al., 1953; Mook and Vogel, 1968; Killingley and Berger,  
1979).

#### 4.3 Site-specific and synoptic information recorded in shell oxygen isotopes

Although individual chronologies from a given river compared well to each other with respect to absolute values, the average  
400 shell oxygen isotope curves of the three studied sites differed in terms of level (Fig. 5+7). Between 1947 and 1992, the average  
 $\delta^{18}\text{O}_{\text{wr}}^*$  values of the three rivers differed by almost 2.00 ‰ (NJB: -12.51 ‰; GTB: -12.21 ‰; GJ: -14.16 ‰). If our  
interpretation is correct and  $\delta^{18}\text{O}$  values of the studied margaritiferids reflect the oxygen isotope signature of the water in which  
they lived, then these numbers reflect hydrological differences in the upstream catchment controlled by a complex set of  
physiographic characteristics: catchment size and elevation, transit times, upstream lake size and depth controlling the potential  
405 for evaporative depletion in  $^{16}\text{O}$ , river flux rates, river width and depth, humidity, wind speed, groundwater influx, differences  
in meltwater influx etc. Detailed monitoring would be required to identify and quantify the actual reason(s) for the observed  
hydrological difference.



410 Despite site-specific differences described above, the  $\delta^{18}\text{O}_{\text{wr}^*}$  chronologies of the three rivers were significantly  
positively correlated to each other, suggesting that common environmental forcings controlled isotopic changes in the entire  
study region. ~~Potential candidates that were addressed in previous studies~~ include changes in the isotope composition of  
precipitation, specifically the amount, origin and air-mass trajectory of winter snow and summer rain, timing of snowmelt as  
well as condensation temperature (Rosqvist et al., 2013). The latter is probably the most difficult to assess, because no records  
are available documenting the temperature, height and latitude at which the respective clouds formed. Likewise, we cannot  
415 confidently assess the link between the isotope signature of precipitation and stream water because only limited and incoherent  
datasets are available from the study region. Besides that, data on precipitation amounts were taken from another locality and  
another time interval. Yet, it is well known that precipitation in northern Scandinavia, particularly during winter, originates  
from two different sources, the Atlantic and arctic/polar regions (Rosqvist et al., 2013), and the moisture of these air masses is  
isotopically distinct (Araguás-Araguás et al., 2000; Bowen and Wilkinson, 2002). During NAO<sup>+</sup> years, the sea level pressure  
420 difference between the Azores High and the Iceland Low is particularly large resulting in mild, wet winters in central and  
northern Europe, with strong westerlies carrying heat and moisture across the Atlantic Ocean toward higher latitudes (Hurrell  
et al., 2003). During NAO<sup>-</sup> years, however, westerlies are weaker and the Polar Front is shifted southward, allowing Arctic air  
masses to reach northern Scandinavia. Precipitation originating from the North Atlantic is isotopically heavier ( $\delta^{18}\text{O}_p = -5.00$   
to  $-10.00$  ‰) than precipitation from subarctic and polar regions ( $\delta^{18}\text{O}_p = -10.00$  to  $-15.00$  ‰). Furthermore, changes in air  
425 mass properties over northern Europe are controlled by atmospheric pressure patterns in the North Atlantic, particularly the  
~~North Atlantic Oscillation~~ during winter (Hurrell, 1995; Hurrell et al., 2003). The positive correlation between  $\delta^{18}\text{O}_{\text{wr}^*}$   
chronologies of the three studied rivers and the winter NAO index (Table 4; Fig. 7a-c, 8a) suggests that the shell isotopes  
recorded a winter precipitation signal, and this can be explained as follows. A larger proportion of arctic air masses carried to  
northern Scandinavia during winter resulted in lower  $\delta^{18}\text{O}_p$ , whereas a predominance of North Atlantic air masses caused the  
430 opposite. In NAO<sup>+</sup> years, strong westerlies carried North Atlantic air masses far northward so that winter precipitation in  
northern Sweden had significantly higher  $\delta^{18}\text{O}_p$  values than during NAO<sup>-</sup> years. When the NAO was in its negative state,  
precipitation originated predominantly from moisture of polar regions which are depleted in  $^{18}\text{O}$ , and hence have lower  $\delta^{18}\text{O}_p$   
values. The specific isotope signature in the rivers was controlled by the snowmelt in spring, where the bivalves recorded the  
isotope signal of the last winter precipitation in their shells. These hypotheses are supported by the correlation of the few  
435 available GNIP and GNIR data with the winter NAO index (Fig. 8d+e). Rosqvist et al. (2007) hypothesized that the summer  
NAO strongly influences  $\delta^{18}\text{O}_p$  and thus, the  $\delta^{18}\text{O}_w$  signature of the open, through-flow lakes in northern Scandinavia.  
However, our data did not support a profound influence of the summer NAO index on  $\delta^{18}\text{O}_{\text{wr}^*}$  (Fig. 7d-f) and this conclusion  
is consistent with other studies likewise suggesting that the summer NAO has a much weaker influence on European climate  
than the NAO during winter (e.g., Hurrell, 1995).

440

Following Baldini et al. (2008) and Comas-Bru et al. (2016), northern Sweden is not the ideal place to conduct oxygen  
isotope-based winter NAO reconstructions. Their model predicted only a weak negative or no correlation between  $\delta^{18}\text{O}_p$  and



the winter NAO index in our study region (Baldini et al., 2008: Fig. 1; Comas-Bru et al. 2016: Fig. 3a). One possible explanation for this is the limited and temporally incoherent GNIP dataset in northern Sweden. In contrast,  $\delta^{18}\text{O}$  data of diatoms from open lakes in northern Sweden were strongly linked to the amount of precipitation and  $\delta^{18}\text{O}_p$ , which in turn both change with the predominant state of the NAO (Hammarlund et al., 2002; Andersson et al., 2010; Rosqvist et al., 2004, 2007, 2013). Findings of the present study substantiated these interpretations by providing, for the first time, oxygen isotope time-series with sufficient temporal resolution (annual) and precise temporal control required for a year-to-year comparison with the NAO index

450

As Comas-Bru et al. (2016) further suggested, the relationship between  $\delta^{18}\text{O}_p$  and the winter NAO index is subject to spatial non-stationarities, because the southern pole of the NAO migrates along a NE-SW axis in response to the state of another major atmospheric circulation mode in the North Atlantic realm, known as the East Atlantic Oscillation or East Atlantic Pattern (EA) (Moore and Renfrew, 2012; Moore et al., 2013; Comas-Bru and McDermott, 2014). Like the NAO, the EA is most distinct during winter and describes atmospheric pressure anomalies between the North Atlantic west of Ireland (Low) and the subtropical North Atlantic (High). Through interaction of these circulation patterns, the correlation between the winter NAO and  $\delta^{18}\text{O}_p$  can weaken at times in certain regions. For example, when both indices are in their positive state, the jet stream shifts poleward (Woolings and Blackburn, 2012) and the storm trajectories that enter Europe in winter take a more northerly route (Comas-Bru et al., 2016). The  $\delta^{18}\text{O}_p$  values will then be lower than during NAO<sup>+</sup>/EA<sup>-</sup> years. To identify whether this applies to the study region, we followed Comas-Bru et al. (2016) and tested if the relationship between the winter NAO and reconstructed river water oxygen isotope data remain significant during years when the signs of both indices are the same (EQ) and during years when they are opposite (OP) (note, the EA index is only available from 1950 onward). As demonstrated in Fig. 8b+c, the correlations between the region-wide shell-based oxygen isotope curve ( $\delta^{18}\text{O}_{\text{wr}(\text{Norrland})^*}$ ) and the winter NAO(EQ) ( $R = 0.83$ ,  $R^2 = 0.69$ ,  $p < 0.0001$ ) as well as the winter NAO(OP) ( $R = 0.65$ ,  $R^2 = 0.42$ ,  $p = 0.0004$ ) remain positive and significant above the 95 % confidence level. Hence, in the study region, the relationship between the winter NAO and  $\delta^{18}\text{O}_{\text{wr}}^*$  is not compromised by the EA;  $\delta^{18}\text{O}_{\text{wr}}^*$  thus serves as a faithful proxy for the winter NAO index.

#### 4.4 Damped river water oxygen isotope signals

Compared to the large isotopic difference between winter precipitation sourced from SW or N air masses, the huge seasonal spread and inter-annual fluctuations of  $\delta^{18}\text{O}_p$  (seasonal: ca. -4.00 to -18.00 ‰, Fig. 6b; inter-annual: ca. -10.50 ‰ to -14.40 ‰; Fig. 8e) as well as the predicted seasonal variance of  $\delta^{18}\text{O}_w$  in the study region (Waterisotopes Database 2019: <http://www.waterisotopes.org>, last access: 25 May 2019: -8.70 to 17.30 ‰), the observed and shell-derived variance of stream water  $\delta^{18}\text{O}$  was notably small and barely exceeded 2.00 ‰, both on seasonal (Fig. 6) and inter-annual time-scales (Fig. 5a-c). This figure agrees well with seasonal amplitudes determined in other rivers at higher latitudes of the Northern Hemisphere (Halder et al. 2015) and can broadly be explained by catchment damping effects due to water collection, mixing, storage and release processes in upstream lakes and groundwater from which these rivers were fed. Catchment mean transit time (MTT),

475



determined via a simple precipitation vs. stream flow isotope signal amplitude damping approach (as per de Walle et al., 1997), is approximately 6 months – corroborating the hypothesis of a mixed snowmelt and precipitation contribution to the stream water  $\delta^{18}\text{O}$  signal during the growing season.

480 The attenuated variance on inter-annual time-scales can partly be explained by inter-annual changes in the amount of winter precipitation and the timing of snowmelt. **cold** or spring temperatures typically resulted in a delayed snowmelt so that lower oxygen isotope signatures still prevailed in the river water when the main growing season of the bivalves started. However, winter precipitation amounts remained below average in  $\text{NAO}^-$  years, so that the net effect on  $\delta^{18}\text{O}_w$  in spring was not massive. **live** In contrast, the amount of snow precipitated during  $\text{NAO}^+$  years was larger, but milder spring temperatures  
485 resulted in an earlier and faster snowmelt, so that the effect on the isotope signature of river water at the beginning of the growing season of the mussels likely remained moderate.

#### 4.5 Sub-annual dating precision and relative changes of seasonal shell growth rate

The precision by which the time can be determined that is represented by individual isotope samples depends on the validity of the seasonal growth model. We assumed that the timing and rate of seasonal shell growth was similar to published data of  
490 *M. margaritifera*. **and** remained the same in each year and each specimen. This may not be entirely correct, because the timing and rate of seasonal shell growth can potentially vary between localities, among years and among individuals. A major dating error exceeding four weeks, however, seems unlikely because the oxygen isotope series of individual specimens at each site were in good agreement. Presumably, the timing of seasonal shell growth is controlled by genetically determined biological clocks, which serve to maintain a consistent duration of the growing season. **and** though shells grew faster in some and slower  
495 in **other years**, the relative seasonal changes of the shell growth likely remained similar and consisted of a gradual increase as the water warmed and more food became available in spring and summer followed by a gradual decline as temperatures dropped in fall. **and** was further assumed that the timing and rate of shell growth has not significantly changed through the lifetime of the organism. **and** that was not the case, it would be impossible to crossdate growth curves from young and old individuals and construct master chronologies (Schöne et al., 2004a, b, 2005). Based on these arguments, seasonal dating errors  
500 were likely minor.

#### 4.6 Shell stable carbon isotopes

Our results are consistent with previous studies using long-lived bivalves (Beirne et al., 2012; Schöne et al., 2005c, 2011), where  $\delta^{13}\text{C}_s$  chronologies of *M. margaritifera* did not show consistent ontogenetic trends, but rather oscillated around an average value (ca. -12.00 to -13.00 ‰). The time-series of NJB were too short to reject the hypothesis of directed trends  
505 through lifetime, but we propose here that the  $\delta^{13}\text{C}_s$  of shells from that river would also average out at ca. -12.50 ‰ like at the other two studied sites, if longer chronologies were available. If a contribution of metabolic  $\text{CO}_2$  to the shell carbonate exists in this species (which we cannot preclude because no  $\delta^{13}\text{C}$  values of the dissolved inorganic carbon (DIC) data are available



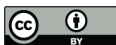

for the studied rivers), it likely remains constant through lifetime. Observed stable carbon isotope signatures in the mussel shells are in the range of those expected and observed in stream waters of northern Europe (-10.00 to -15.00 ‰; Leng and Marshall, 2004)

Seasonal and inter-annual changes of  $\delta^{13}\text{C}_s$  could be indicative of changes in primary production, food composition, respiration and influx of terrestrial detritus. However, in the absence of information on how the environment of the studied rivers changed through time, we can only speculate about possible causes of temporal  $\delta^{13}\text{C}_{\text{DIC}}$  variations. For example, increased primary production in the water would not only have propelled shell growth rate, but also resulted in a depletion of  $^{12}\text{C}$  in the DIC pool and thus, higher  $\delta^{13}\text{C}_{\text{DIC}}$  and  $\delta^{13}\text{C}_s$  values. However, just the opposite was observed on seasonal and inter-annual time-scales. Highest  $\delta^{13}\text{C}_s$  values often occurred near the annual growth lines, i.e., during times of slow growth, and, although not statistically significant, annual  $\delta^{13}\text{C}_{s(d)}$ \* at NJB and GTB was inversely related to shell growth rate (Fig. 7g+h; Table 4). Accordingly,  $\delta^{13}\text{C}_{s(d)}$ \* does not seem to reflect phytoplankton dynamics. Another possibility is that a change in the composition of mussel food occurred which changed the shell stable carbon isotope values without a statistically significant effect on shell growth rate. Since the isotope signatures of potential food sources differ from each other (e.g., Gladyshev, 2009), a change in relative proportions of phytoplankton, decomposing plant litter from the surrounding catchment vegetation, bacteria, POM deriving from higher organisms etc. could have left a footprint in the  $\delta^{13}\text{C}_{s(d)}$ \* values. Furthermore, seasonal and inter-annual changes in respiration or influx of terrestrial detritus may have changed the isotope signature of the DIC pool and thus the shells. Support for the latter comes from the negative correlation between  $\delta^{13}\text{C}_{s(d)}$ \* and the winter NAO. After wet (snow-rich) winters (NAO<sup>+</sup> years), stronger terrestrial runoff may have flushed increased amounts of light carbon into the rivers which lowered  $\delta^{13}\text{C}_{\text{DIC}}$  values. To test these hypotheses, data on the stable carbon isotope signature of digested food and DIC would be required, a task for subsequent studies.

## 5 Summary and conclusions

Stable oxygen isotope values in shells of freshwater pearl mussels, *M. margaritifera*, from rivers in northern Sweden mirror stream water stable oxygen isotope values. Despite a well-known damping of the precipitation signal in stream water isotope records, these mollusks archive local precipitation and synoptic atmospheric circulation signals, specifically the winter NAO. Stable carbon isotope data of the shells are more challenging to interpret, but they seem to record local environmental conditions such as changes in DIC and/or food composition.

The bivalve shell oxygen isotope record presented here extends back to AD 1819, but there is potential for developing longer isotope chronologies through the use of fossil shells of *M. margaritifera* collected in the field or taken from museum collections. With suitable material and by applying the crossdating technique, the existing chronology could probably be extended by several centuries back in time. Stream water isotope records may shed new light on pressing questions related to



540 climate change impacts on river systems, mechanistic understanding of water flow and quality controlling processes,  
calibration and validation of flow and transport models, climate and earth system modeling, time variant catchment travel time  
modeling, etc. Longer and coherent chronologies are essential to reliably identify multidecadal and century-scale climate  
dynamics. Even individual radiocarbon dated fossil shells that do not overlap with the existing master chronology can provide  
valuable paleoclimate information, because each specimen of *M. margaritifera* can open a seasonally to annually resolved,  
545 multi-year window into the history of rivers.

**Acknowledgements.** We thank Denis Scholz and Erika Pietroniro for constructive discussions.

**Data and code availability.** All data and code used in this study are available from the authors on request.

550

**Sample availability.** Bivalve shell samples are archived and stored in the paleontological collection of the University of  
Mainz.

**Author contributions.** BRS designed the study, performed the analyses and wrote the manuscript; AEM and SMB conducted  
555 the field work and collected samples; SMB sampled the shells and temporally aligned the isotope data; JF isotopically analyzed  
the shell powder; LP conducted MTT calculations. All authors jointly contributed to the discussion and interpretation of the  
data.

**Competing interests.** The authors declare that they have no conflict of interest.

560

**Financial support.** This study has been made possible through a research grant by the Deutsche Forschungsgemeinschaft  
DFG to BRS (SCHO793/1).

## References

565 Andersson, S., Rosqvist, G., Leng, M. J., Wastegard, S., and Blaauw, M.: Late Holocene climate change in central Sweden  
inferred from lacustrine stable isotope data, *J. Quat. Sci.*, 25, 1305–1316, <https://doi.org/10.1002/jqs.1415>, 2010.

Araguás-Araguás, L., Froehlich, K., and Rozanski, K.: Deuterium and oxygen-18 isotope composition of precipitation and  
atmospheric moisture, *Hydrol. Process.*, 14, 1341–1355, [https://doi.org/10.1002/1099-1085\(20000615\)14:8<1341::AID-](https://doi.org/10.1002/1099-1085(20000615)14:8<1341::AID-)  
570 HYP983>3.0.CO;2-Z, 2000.



- Baillie, M. G. L., and Pilcher, J. R.: A simple crossdating program for tree-ring research, *Tree-ring Bull.*, 33, 7–14, 1973.
- 575 Baldini, L. M., McDermott, F., Foley, A. M., and Baldini, J. U. L.: Spatial variability in the European winter precipitation  $\delta^{18}\text{O}$ -NAO relationship: Implications for reconstructing NAO-mode climate variability in the Holocene, *Geophys. Res. Lett.*, 35, L04709, 6 p., <https://doi.org/10.1029/2007GL032027>, 2008.
- 580 Beirne, E. C., Wanamaker Jr., A. D., and Feindel, S. C.: Experimental validation of environmental controls on the  $\delta^{13}\text{C}$  of *Arctica islandica* (ocean quahog) shell carbonate, *Geochim. Cosmochim. Acta* 84, 395–409, <https://doi.org/10.1016/j.gca.2012.01.021>, 2012.
- Bowen, G. J., and Wilkinson, B.: Spatial distribution of  $\delta^{18}\text{O}$  in meteoric precipitation, *Geology*, 30, 315–318, [https://doi.org/10.1130/0091-7613\(2002\)030%3C0315:SDOOIM%3E2.0.CO;2](https://doi.org/10.1130/0091-7613(2002)030%3C0315:SDOOIM%3E2.0.CO;2), 2002.
- 585 Bowen G. J., Wassenaar L. I., and Hobson K. A.: Global application of stable hydrogen and oxygen isotopes to wildlife forensics, *Oecologia*, 143, 337–348, doi:10.1007/s00442-004-1813-y, 2005.
- Burgman, J. O., Eriksson, E., and Westman, F.: Oxygen-18 variation in river waters in Sweden. Avd. Hydrol. Unpublished Report, Uppsala Univ., Naturgeogr. Inst., 42 p., 1981.
- 590 Butler, P. G., Wanamaker Jr., A. D., Scourse, J. D., Richardson, C. A., and Reynolds, D. J.: Variability of marine climate on the North Icelandic Shelf in a 1357-year proxy archive based on growth increments in the bivalve *Arctica islandica*, *Palaeogeogr. Palaeoclimatol. Palaeoecol.*, 373, 141–151, <https://doi.org/10.1016/j.palaeo.2012.01.016>, 2013.
- 595 Comas-Bru, L., and McDermott, F.: Impacts of the EA and SCA patterns on the European twentieth century NAO winter climate relationship, *Quart. J. R. Meteorol. Soc.*, 140, 354–363, <https://doi.org/10.1002/qj.2158>, 2014.
- 600 Comas-Bru, L., McDermott, F., and Werner, M.: The effect of the East Atlantic pattern on the precipitation  $\delta^{18}\text{O}$ -NAO relationship in Europe, *J. Clim. Dyn.*, 47, 2059–2069, <https://doi.org/10.1007/s00382-015-2950-1>, 2016.
- Darling, W. G.: Hydrological factors in the interpretation of stable isotopic proxy data present and past: a European perspective, *Quat. Sci. Rev.*, 23, 743–770, <https://doi.org/10.1016/j.quascirev.2003.06.016>, 2004.
- 605 Darling, W. G., and Bowes, M. J.: A long-term study of stable isotopes as tracers of processes governing water flow and quality in a lowland river basin, *Hydrol. Process.*, 30, 2178–2195, <https://doi.org/10.1016/j.quascirev.2003.06.016>, 2016.



- Dettman, D. L., Reische, A. K., and Lohmann, K. C.: Controls on the stable isotope composition of seasonal growth bands in aragonitic fresh-water bivalves (unionidae), *Geochim. Cosmochim. Acta*, 63, 1049–1057, [https://doi.org/10.1016/S0016-7037\(99\)00020-4](https://doi.org/10.1016/S0016-7037(99)00020-4), 1999.
- 610
- DeWalle, D. R., Edwards, P. J., Swistock, B. R., Aravena, R., and Drimmie, R. J.: Seasonal isotope hydrology of three Appalachian forest catchments. *Hydrol. Process.*, 11, 1895–1906, [https://doi.org/10.1002/\(SICI\)1099-1085\(199712\)11:15<1895::AID-HYP538>3.0.CO;2-%23](https://doi.org/10.1002/(SICI)1099-1085(199712)11:15<1895::AID-HYP538>3.0.CO;2-%23), 1997.
- 615
- Dunca, E., and Mutvei, H.: Comparison of microgrowth pattern in *Margaritifera margaritifera* shells from south and north Sweden, *Am. Malacol. Bull.*, 16, 239–250, 2001.
- Dunca E., Schöne, B.R., and Mutvei, H.: Freshwater bivalves tell of past climates: But how clearly do shells from polluted rivers speak? *Palaeogeogr. Palaeoclimatol. Palaeoecol.*, 228, 43–57, <https://doi.org/10.1016/j.palaeo.2005.03.050>, 2005.
- 620
- Epstein S., Buchsbaum R., Lowenstam H. A., and Urey H. C.: Revised carbonate-water isotopic temperature scale, *Geol. Soc. Am. Bull.*, 64, 1315–1326, [https://doi.org/10.1130/0016-7606\(1953\)64\[1315:RCITS\]2.0.CO;2](https://doi.org/10.1130/0016-7606(1953)64[1315:RCITS]2.0.CO;2), 1953.
- Frank, D., Esper, J., and Cook, E. R.: Adjustment for proxy number and coherence in a large-scale temperature reconstruction, *Geophys. Res. Lett.*, 34, 5 p., <https://doi.org/10.1029/2007GL030571>, 2007.
- 625
- Füllenbach, C. S., Schöne, B. R., and Mertz-Kraus, R.: Strontium/lithium ratio in shells of *Cerastoderma edule* (Bivalvia) - A new potential temperature proxy for brackish environments, *Chem. Geol.*, 417, 341–355, <http://dx.doi.org/10.1016/j.chemgeo.2015.10.030>, 2015.
- 630
- Geeza, T. J., Gillikin, D. P., Goodwin, D. H., Evans, S. D., Watters, T., and Warner, N. R.: Controls on magnesium, manganese, strontium, and barium concentrations recorded in freshwater mussel shells from Ohio. *Chem. Geol.*, <https://doi.org/10.1016/j.chemgeo.2018.01.001>, in press a.
- 635
- Geeza, T. J., Gillikin, D. P., McDevitt, B., Van Sice, K., and Warner, N. R.: Accumulation of Marcellus Formation oil and gas wastewater metals in freshwater mussel shells. *Environ. Sci. Technol.*, <http://dx.doi.org/10.1021/acs.est.8b02727>, in press b.
- Gladyshev, M. I.: Stable isotope analyses in aquatic ecology (a review), *Journal of Siberian Federal University - Biology* 4, 381–402, <https://doi.org/10.17516/1997-1389-0220>, 2009.



640

Gonfiantini, R., Stichler, W., and Rozanski, K.: Standards and intercomparison materials distributed by the International Atomic Energy Agency for stable isotope measurements (IAEA-TECDOC-825), International Atomic Energy Agency (IAEA), Vienna, Austria, 13–29, [https://www-pub.iaea.org/MTCD/publications/PDF/te\\_825\\_prn.pdf](https://www-pub.iaea.org/MTCD/publications/PDF/te_825_prn.pdf), 1995.

645 Grossman, E. L., and Ku, T.-L.: Oxygen and carbon isotope fractionation in biogenic aragonite; temperature effects, *Chem. Geol. Isot. Geosci. Sect.*, 59, 59–74, [https://doi.org/10.1016/0168-9622\(86\)90057-6](https://doi.org/10.1016/0168-9622(86)90057-6), 1986.

Halder, J., Terzer, S., Wassenaar, L. I., Araguás-Araguás, L., and Aggarwal, P. K.: The Global Network of Isotopes in Rivers (GNIR): integration of water isotopes in watershed observation and riverine research, *Hydrol. Earth Syst. Sci.*, 19, 3419–3431, <https://doi.org/10.5194/hess-19-3419-2015>, 2015.

Hammarlund, D., Barnekow, L., Birks, H. J. B., Buckardt, B., and Edwards, T. W. D.: Holocene changes in atmospheric circulation recorded in the oxygen-isotope stratigraphy of lacustrine carbonates from northern Sweden, *Holocene*, 12, 339–351, <https://doi.org/10.1191/02F0959683602hl548rp>, 2002.

655

Helama, S., Schöne, B. R., Black, B.A., and Dunca, E.: Constructing long-term proxy series for aquatic environments with absolute dating control using a sclerochronological approach: introduction and advanced applications, *Mar. Freshw. Res.*, 57, 591–599, <https://doi.org/10.1071/MF05176>, 2006.

660 Hurrell, J. W.: Decadal trends in the North Atlantic Oscillation: regional temperatures and precipitation, *Science*, 269, 676–679, <https://doi.org/10.1126/science.269.5224.676>, 1995.

Hurrell, J. W., Kushnir, Y., Ottersen, G., and Visbeck, M.: An overview of the North Atlantic Oscillation, in: *The North Atlantic Oscillation. Climatic Significance and Environmental Impact*, edited by: Hurrell, J.W., Kushnir, Y., Ottersen, G., and Visbeck, M., *Geophysical Monograph*, 134, American Geophysical Union, Washington, DC, U.S.A., 1–35, <https://doi.org/10.1029/134GM01>, 2003.

Kaandorp, R. J. G., Vonhof, H. B., Del Busto, C., Wesselingh, F. P., Ganssen, G. M., Marmól, A. E., Romero Pittman, L., and van Hinte, J. E.: Seasonal stable isotope variations of the modern Amazonian freshwater bivalve *Anodontites trapesialis*, *Palaeogeogr. Palaeoclimatol. Palaeoecol.*, 194, 339–354, [https://doi.org/10.1016/S0031-0182\(03\)00332-8](https://doi.org/10.1016/S0031-0182(03)00332-8), 2003.

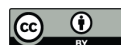

- Kelemen, Z., Gillikin, D. P., Graniero, L. E., Havel, H., Darchambeau, F., Borges, A. V., Yambélé, A., Bassirou, A., and Bouillon, S.: Calibration of hydroclimate proxies in freshwater bivalve shells from Central and West Africa. *Geochim. Cosmochim. Acta*, 208, 41–62, <http://dx.doi.org/10.1016/j.gca.2017.03.025>, 2017.
- 675
- Kelemen, Z., Gillikin, D. P., and Bouillon, S.: Relationship between river water chemistry and shell chemistry of two tropical African freshwater bivalve species. *Chem. Geol.*, <https://doi.org/10.1016/j.chemgeo.2018.04.026>, in press.
- Killingley, J. S., and Berger, W. H.: Stable isotopes in a mollusk shell: detection of upwelling events, *Science*, 205, 186–188, <https://doi.org/10.1126/science.205.4402.186>, 1979.
- 680
- Leng, M. L.: Isotopes in Palaeoenvironmental Research, *Developments in Palaeoenvironmental Research* 10, 1–307, <https://doi.org/10.1007/1-4020-2504-1>, 2006.
- 685
- Leng, M. L., and Marshall, J. D.: Palaeoclimate interpretation of stable isotope data from lake sediment archives, *Quat. Sci. Rev.*, 23, 811–831, <https://doi.org/10.1016/j.quascirev.2003.06.012>, 2004.
- Mook, W. G., and Vogel, J. C.: Isotopic equilibrium between shells and their environment, *Science*, 159, 874–875, <https://doi.org/10.1126/science.159.3817.874>, 1968.
- 690
- Moore, G. W. K., and Renfrew, I. A.: Cold European winters: interplay between the NAO and the East Atlantic mode, *Atmos. Sci. Lett.*, 13, 1–8, <https://doi.org/10.1002/asl.356>, 2012.
- Moore, G. W. K., Renfrew, I. A., and Pickart, R. S.: Multidecadal mobility of the North Atlantic Oscillation, *J. Clim.*, 26, 2453–2466, <https://doi.org/10.1175/JCLI-D-12-00023.1>, 2013.
- 695
- Moorkens, E., Cordeiro, J., Seddon, M. B., von Proschwitz, T., and Woolnough, D.: *Margaritifera margaritifera* (errata version published in 2018). The IUCN Red List of Threatened Species 2018, e.T12799A128686456, <http://dx.doi.org/10.2305/IUCN.UK.2017-3.RLTS.T12799A508865.en>, 2018.
- 700
- Mutvei, H., and Westermark, T.: How environmental information can be obtained from naiad shells, *Ecol. Stud.*, 145, 367–379, [https://doi.org/10.1007/978-3-642-56869-5\\_21](https://doi.org/10.1007/978-3-642-56869-5_21), 2001.
- Nyström, J., Dunca, E., Mutvei, H., and Lindh, U.: Environmental history as reflected by freshwater pearl mussels in the river Vramsån, southern Sweden, *Ambio* 25, 350–355, <https://www.jstor.org/stable/4314490>, 1996.
- 705



- Pfister, L., Thielen, F., Deloule, E., Valle, N., Lentzen, E., Grave, C., Beisel, J.-N., and McDonnell, J. J.: Freshwater pearl mussels as a stream water stable isotope recorder, *Ecohydrol.*, 2018e, e2007, 10 p. <https://doi.org/10.1002/eco.2007>, 2018.
- 710 Pfister, L., Grave, C., Beisel, J.-N., McDonnell, J. J.: A global assessment of freshwater mollusk shell oxygen isotope signatures and their relation to precipitation and stream water. *Sci. Rep.*, 9, 4312, 6 p. <https://doi.org/10.1038/s41598-019-40369-0>, 2019.
- Pulteney, R.: A General View of the Writing of Linnaeus, Payne and White, London, <https://doi.org/10.5962/bhl.title.96885>,  
715 1781.
- Rank, D., Wyhlidal, S., Schott, K., Weigand, S., and Oblin, A.: Temporal and spatial distribution of isotopes in river water in Central Europe: 50 years of experience with the Austrian network of isotopes in rivers, *Isotop. Environ. Health Stud.*, 54, 115–136, <https://doi.org/10.1080/10256016.2017.1383906>, 2017.
- 720 Reckerth, A., Stichler, W., Schmidt, A., and Stumpp, Ch.: Long-term data set analysis of stable isotopic composition in German rivers, *J. Hydrol.* 552, 718–731, <https://doi.org/10.1016/j.jhydrol.2017.07.022>, 2017.
- Risi, C., Ogé, J., Bony, S., and Kurz Besson, C.: The water isotopic version of the land-surface model ORCHIDEE: Implementation, evaluation, sensitivity to hydrological parameters, *Hydrol. Current Res.*, 7, 258, doi:10.4172/2157-7587.1000258, 2016.
- 725 Rodgers, P., Soulsby, C., Waldron, S., and Tetzlaff, D.: Using stable isotope tracers to identify hydrological flow paths, residence times and landscape controls in a mesoscale catchment, *Hydrol. Earth Syst. Sci.*, 9, 139–155, <https://doi.org/10.5194/hessd-2-1-2005>, 2005.
- 730 Rosqvist, G., Jonsson, C., Yam, R., Karlen, W., and Shemesh, A.: Diatom oxygen isotopes in pro-glacial lake sediments from northern Sweden: a 5000 year record of atmospheric circulation, *Quat. Sci. Rev.*, 23, 851–859, <https://doi.org/10.1016/j.quascirev.2003.06.009>, 2004.
- 735 Rosqvist, G. C., Leng, M. J., and Jonsson, C.: North Atlantic region atmospheric circulation dynamics inferred from a late-Holocene lacustrine carbonate isotope record, northern Swedish Lapland, *Holocene*, 17, 867–873, <https://doi.org/10.1177/0959683607080508>, 2007.



- 740 Rosqvist, G. C., Leng, M. J., Goslar, T., Sloane, H. J., Bigler, C., Cunningham L., Dadal, A., Bergman, J., Berntsson, A.,  
Jonsson, C., and Wastegård, S.: Shifts in precipitation during the last millennium in northern Scandinavia from lacustrine  
isotope records, *Quat. Sci. Rev.*, 66, 22–34, <https://doi.org/10.1016/j.quascirev.2012.10.030>, 2013.
- Schöne, B. R.: *Arctica islandica* (Bivalvia): A unique paleoenvironmental archive of the northern North Atlantic Ocean, *Global*  
745 *Planet. Change*, 111, 199–225, <https://doi.org/10.1016/j.gloplacha.2013.09.013>, 2013.
- Schöne, B. R., and Krause, R. A.: Retrospective environmental biomonitoring – Mussel Watch expanded. *Global Planetary*  
*Change*, 144, <http://dx.doi.org/10.1016/j.gloplacha.2016.08.002>, 228–251.
- 750 Schöne, B. R., Dunca, E., Mutvei, H., and Norlund, U. A 217-year record of summer air temperature reconstructed from  
freshwater pearl mussels (*M. margaritifera*, Sweden), *Quat. Sci. Rev.*, 23, 1803–1816,  
<https://doi.org/10.1016/j.quascirev.2004.02.017>, 2004a.
- Schöne, B. R., Dunca, E., Mutvei, H., and Norlund, U.: Corrigendum to “A 217-year record of summer air temperature  
755 reconstructed from freshwater pearl mussels (*M. margaritifera*, Sweden)” [*Quaternary Science Reviews* 23 (2004) 1803–  
1816]. *Quat. Sci. Rev.*, 23, 2057, <https://doi.org/10.1016/j.quascirev.2004.07.005>, 2004b.
- Schöne, B. R., Dunca, E., Mutvei, H., Baier, S., and Fiebig, J.: Scandinavian climate since the late 18<sup>th</sup> century reconstructed  
from shells of bivalve mollusks, *Z. Dt. Ges. Geowiss.*, 156, 501–515, <https://dx.doi.org/10.1127/1860-1804/2005/0156-0501>,  
760 2005a.
- Schöne, B. R., Dunca, E., Fiebig, J., and Pfeiffer, M.: Mutvei’s solution: an ideal agent for resolving microgrowth structures  
of biogenic carbonates, *Palaeogeogr. Palaeoclimatol. Palaeoecol.*, 228, 149–166, <https://doi.org/10.1016/j.palaeo.2005.03.054>,  
2005b.
- 765 Schöne, B. R., Fiebig, J., Pfeiffer, M., Gleß, R., Hickson, J., Johnson, A. L. A., Dreyer, W., and Oschmann, W.: Climate  
records from a bivalved Methuselah (*Arctica islandica*, Mollusca; Iceland), *Palaeogeogr. Palaeoclimatol. Palaeoecol.*, 228,  
130–148, <https://doi.org/10.1016/j.palaeo.2005.03.049>, 2005c.
- 770 Schöne, B. R., Wanamaker Jr., A. D., Fiebig, J., Thébault, J., and Kreutz, K. J.: Annually resolved  $\delta^{13}\text{C}_{\text{shell}}$  chronologies of  
long-lived bivalve mollusks (*Arctica islandica*) reveal oceanic carbon dynamics in the temperate North Atlantic during recent  
centuries, *Palaeogeogr. Palaeoclimatol. Palaeoecol.*, 302, 31–42, <https://doi.org/10.1016/j.palaeo.2010.02.002>, 2011.





775 Teranes, J. L., and McKenzie, J. A.: Lacustrine oxygen isotope record of 20<sup>th</sup>-century climate change in central Europe:  
evaluation of climatic controls on oxygen isotopes in precipitation, *J. Paleolimnol.*, 26, 131–146,  
<https://doi.org/10.1023/A:1011175701502>, 2001.

780 Trouet, V., Esper, J., Graham, N. E., Baker, A., Scourse, J. D., and Frank, D. C.: Persistent positive North Atlantic Oscillation  
mode dominated the Medieval Climate Anomaly, *Science*, 324, 78–80, <https://doi.org/10.1126/science.1166349>, 2009.

Versteegh, E. A. A., Troelstra, S. R., Vonhof, H. B., and Kroon, D.: Oxygen isotope composition of bivalve seasonal growth  
increments and ambient water in the rivers Rhine and Meuse, *Palaios*, 24, 497–504, <https://doi.org/10.2110/palo.2008.p08-071r>, 2009.

785 von Hessling, T.: Die Perlmuscheln und ihre Perlen naturwissenschaftlich und geschichtlich; mit Berücksichtigung der  
Perlengewässer Bayerns, Engelmann, Leipzig, <https://doi.org/10.5962/bhl.title.47047>, 1859.

Woollings, T., and Blackburn, M.: The North Atlantic jet stream under climate change and its relation to the NAO and EA  
patterns, *J. Clim.*, 25, 886–902, <https://doi.org/10.1175/JCLI-D-11-00087.1>, 2012.

790 Ziuganov, V., San Miguel, E., Neves, R.J., Longa, A., Fernández, C., Amaro, R., Beletsky, V., Popkovitch, E., Kaliuzhin, S.,  
and Johnson, T.: Life span variation of the freshwater pearl shell: A model species for testing longevity mechanisms in animals,  
*Ambio*, 29, 102–105, <https://doi.org/10.1579/0044-7447-29.2.102>, 2000.



795

**Table 1: Shells of *Margaritifera margaritifera* from three rivers in northern Sweden used in present study for isotope and growth pattern analysis. Last set of digits denotes whether bivalves were collected alive (a) or dead (d), specimen number and which valve was used (R = right, L = left). § = minimum estimate of lifespan. L = last sampled year incomplete. A = Add ten years to these values to obtain approximate ontogenetic years.**

| River name            | Specimen ID | Coordinates and elevation                            | Age <sup>§</sup> (yr) | Life during year AD | # isotope samples (coverage of years <sup>A</sup> ) |
|-----------------------|-------------|------------------------------------------------------|-----------------------|---------------------|-----------------------------------------------------|
| Nuortejaurbäcken      | ED-NJB-A6R  | 65°42'13.22"N,<br>19°02'31.01"E,<br>ca. 400 m a.s.l. | 22                    | 1972-1993           | 175 (1-22 <sup>b</sup> )                            |
|                       | ED-NJB-A4R  |                                                      | 27                    | 1967-1993           | 154 (2-27 <sup>b</sup> )                            |
|                       | ED-NJB-A2R  |                                                      | 48                    | 1946-1993           | 78 (2-48 <sup>b</sup> )                             |
|                       | ED-NJB-A3R  |                                                      | 24                    | 1970-1993           | 50 (1-24 <sup>b</sup> )                             |
| Grundträsktjärnbäcken | ED-GTB-A1R  | 66°02'59.98"N,                                       | 51                    | 1943-1993           | 368 (2-49)                                          |
|                       | ED-GTB-A2R  | 22°05'02.25"E,<br>ca. 90 m a.s.l.                    | 51                    | 1943-1993           | 315 (3-49)                                          |
| Görjeån               | ED-GJ-A1L   | 66°20'30.77"N,<br>20°30'15.02"E,<br>ca. 200 m a.s.l. | 80                    | 1916-1997           | 56 (25-80 <sup>b</sup> )                            |
|                       | ED-GJ-A2R   |                                                      | 82                    | 1918-1997           | 76 (1-78)                                           |
|                       | ED-GJ-A3L   |                                                      | 123                   | 1875-1997           | 110 (29-122)                                        |
|                       | ED-GJ-D5L   |                                                      | 181                   | 1819-1999           | 169 (1-180)                                         |



805 **Table 2: Weights for isotope samples of *Margaritifera margaritifera*. Due to variations of seasonal shell growth rate, each isotope sample taken at equidistant intervals represents different amounts of time. To calculate seasonal or annual averages from individual isotope data, the relative proportion of time of the growing season contained in each sample must be considered when weighted averages are computed. The duration of the growing season comprises 143 days and covers the time interval of 23 May to 12 October.**

| Number of isotope samples per annual increment | Weight of n <sup>th</sup> isotope sample (%) within an annual increment; direction of growth to the right (increasing numbers) |                 |                 |                 |                 |                 |                 |                 |                 |                  |                  |                  |                  |                  |                  |                  |  |
|------------------------------------------------|--------------------------------------------------------------------------------------------------------------------------------|-----------------|-----------------|-----------------|-----------------|-----------------|-----------------|-----------------|-----------------|------------------|------------------|------------------|------------------|------------------|------------------|------------------|--|
|                                                | 1 <sup>st</sup>                                                                                                                | 2 <sup>nd</sup> | 3 <sup>rd</sup> | 4 <sup>th</sup> | 5 <sup>th</sup> | 6 <sup>th</sup> | 7 <sup>th</sup> | 8 <sup>th</sup> | 9 <sup>th</sup> | 10 <sup>th</sup> | 11 <sup>th</sup> | 12 <sup>th</sup> | 13 <sup>th</sup> | 14 <sup>th</sup> | 15 <sup>th</sup> | 16 <sup>th</sup> |  |
| 1                                              | 100.00                                                                                                                         |                 |                 |                 |                 |                 |                 |                 |                 |                  |                  |                  |                  |                  |                  |                  |  |
| 2                                              | 42.66                                                                                                                          | 57.34           |                 |                 |                 |                 |                 |                 |                 |                  |                  |                  |                  |                  |                  |                  |  |
| 3                                              | 27.97                                                                                                                          | 31.47           | 40.56           |                 |                 |                 |                 |                 |                 |                  |                  |                  |                  |                  |                  |                  |  |
| 4                                              | 22.38                                                                                                                          | 20.28           | 24.47           | 32.87           |                 |                 |                 |                 |                 |                  |                  |                  |                  |                  |                  |                  |  |
| 5                                              | 18.18                                                                                                                          | 15.39           | 18.88           | 20.27           | 27.28           |                 |                 |                 |                 |                  |                  |                  |                  |                  |                  |                  |  |
| 6                                              | 15.38                                                                                                                          | 12.59           | 14.69           | 16.78           | 18.18           | 22.38           |                 |                 |                 |                  |                  |                  |                  |                  |                  |                  |  |
| 7                                              | 13.29                                                                                                                          | 11.88           | 11.19           | 13.29           | 13.99           | 16.08           | 20.28           |                 |                 |                  |                  |                  |                  |                  |                  |                  |  |
| 8                                              | 11.59                                                                                                                          | 10.79           | 9.09            | 11.19           | 12.58           | 11.89           | 14.69           | 18.18           |                 |                  |                  |                  |                  |                  |                  |                  |  |
| 9                                              | 10.49                                                                                                                          | 9.79            | 7.69            | 9.09            | 10.49           | 11.89           | 10.49           | 13.29           | 16.78           |                  |                  |                  |                  |                  |                  |                  |  |
| 10                                             | 9.79                                                                                                                           | 8.39            | 7.69            | 7.70            | 9.09            | 9.78            | 9.80            | 10.49           | 11.89           | 15.38            |                  |                  |                  |                  |                  |                  |  |
| 11                                             | 9.09                                                                                                                           | 7.69            | 7.70            | 5.59            | 7.69            | 8.39            | 9.79            | 8.40            | 10.49           | 10.48            | 14.69            |                  |                  |                  |                  |                  |  |
| 12                                             | 8.39                                                                                                                           | 6.99            | 7.00            | 5.59            | 6.99            | 7.70            | 8.39            | 8.39            | 7.69            | 10.49            | 9.09             | 13.29            |                  |                  |                  |                  |  |
| 13                                             | 7.69                                                                                                                           | 6.30            | 6.99            | 5.59            | 5.60            | 6.29            | 7.69            | 8.40            | 6.99            | 7.69             | 9.79             | 8.39             | 12.59            |                  |                  |                  |  |
| 14                                             | 7.69                                                                                                                           | 5.60            | 6.29            | 5.59            | 4.90            | 6.29            | 6.30            | 6.99            | 6.99            | 7.70             | 6.28             | 9.10             | 8.39             | 11.89            |                  |                  |  |
| 15                                             | 6.29                                                                                                                           | 6.30            | 5.59            | 5.60            | 4.19            | 5.60            | 5.59            | 6.99            | 6.30            | 6.99             | 6.29             | 7.00             | 8.38             | 7.70             | 11.19            |                  |  |
| 16                                             | 6.29                                                                                                                           | 5.60            | 5.59            | 4.90            | 4.19            | 4.90            | 5.59            | 5.60            | 6.29            | 4.90             | 7.69             | 5.59             | 7.70             | 6.99             | 7.69             | 10.49            |  |

810



**Table 3: Relationship between stable oxygen isotope values in precipitation, river water and shells of *Margaritifera margaritifera* from Nuortejaurbäcken during different seasons of the year. The rationale behind the comparison of  $\delta^{18}\text{O}$  values of winter precipitation and spring river water or shell carbonate is that the isotope signature of meltwater may have left a signal in the water.**

| Season                                    | $\delta^{18}\text{O}_p$ (Racksund)   | $\delta^{18}\text{O}_w$ (Skellefteälven)                                           |                                                         |                                                                                    |
|-------------------------------------------|--------------------------------------|------------------------------------------------------------------------------------|---------------------------------------------------------|------------------------------------------------------------------------------------|
|                                           |                                      | June-Sep                                                                           | Dec <sub>t-1</sub> -Feb <sub>t</sub>                    | May-Oct                                                                            |
|                                           | Dec <sub>t-1</sub> -Feb <sub>t</sub> | -11.09 ‰                                                                           | -14.10 ‰                                                | -12.46 ‰                                                                           |
|                                           | June-Sep                             |                                                                                    |                                                         | -12.39 ‰                                                                           |
|                                           | May-Oct                              |                                                                                    |                                                         | -13.08 ‰                                                                           |
|                                           |                                      | <b>R = 0.90</b><br><b>R<sup>2</sup> = 0.85</b><br><b>p = 0.050</b><br><b>N = 4</b> |                                                         |                                                                                    |
| $\delta^{18}\text{O}_w$<br>Skellefteälven | June-Sep                             |                                                                                    | R = 0.90<br>R <sup>2</sup> = 0.82<br>p = 0.097<br>N = 4 |                                                                                    |
|                                           | May-June                             |                                                                                    | R = 0.89<br>R <sup>2</sup> = 0.78<br>p = 0.115<br>N = 4 |                                                                                    |
|                                           | May-Oct                              | <b>R = 1.00</b><br><b>R<sup>2</sup> = 1.00</b><br><b>p = 0.001</b><br><b>N = 4</b> |                                                         | <b>R = 0.99</b><br><b>R<sup>2</sup> = 0.97</b><br><b>p = 0.014</b><br><b>N = 4</b> |
| $\delta^{18}\text{O}_{w*}$<br>ED-NJB-A6R  | June-Sep                             | <b>R = 0.98</b><br><b>R<sup>2</sup> = 0.95</b><br><b>p = 0.023</b><br><b>N = 4</b> |                                                         | R = 0.83<br>R <sup>2</sup> = 0.68<br>p = 0.175<br>N = 5                            |
|                                           | May-June                             |                                                                                    | R = 0.29<br>R <sup>2</sup> = 0.08<br>p = 0.711<br>N = 4 | R = 0.44<br>R <sup>2</sup> = 0.19<br>p = 0.561<br>N = 4                            |
|                                           | May-Oct                              | <b>R = 0.98</b><br><b>R<sup>2</sup> = 0.97</b><br><b>p = 0.017</b><br><b>N = 4</b> |                                                         | <b>R = 0.99</b><br><b>R<sup>2</sup> = 0.98</b><br><b>p = 0.008</b><br><b>N = 4</b> |
| $\delta^{18}\text{O}_{w*}$<br>ED-NJB-A4R  | June-Sep                             | <b>R = 0.98</b><br><b>R<sup>2</sup> = 0.97</b><br><b>p = 0.017</b><br><b>N = 4</b> |                                                         | R = 0.92<br>R <sup>2</sup> = 0.85<br>p = 0.080<br>N = 4                            |
|                                           | May-June                             |                                                                                    | R = 0.78<br>R <sup>2</sup> = 0.67<br>p = 0.244<br>N = 4 | R = 0.90<br>R <sup>2</sup> = 0.80<br>p = 0.105<br>N = 4                            |



820 **Table 4: Site-specific annual isotope chronologies of *Margaritifera margaritifera* shells linearly regressed against winter and summer NAO (wNAO, sNAO) as well as detrended and standardized shell growth rate (SGI).  $\delta^{18}\text{O}_{\text{wr}}$ \* data were computed from shell oxygen isotope data and temperature data computed from instrumental air temperatures, whereas in the case of  $\delta^{18}\text{O}_{\text{wr(SGI)}}*$  data, temperatures were estimated from a growth-temperature model. See text for details. Statistically significant values ( $p < 0.05$ ) are bold.**

|                       | $\delta^{18}\text{O}_{\text{wr}}*$                                  |                                                                     |                                                                     | $\delta^{18}\text{O}_{\text{wr(SGI)}}*$                             |                                                                     |                                                                     | $\delta^{13}\text{C}_{\text{s(d)}}*$                    |                                                                     |                                                        |
|-----------------------|---------------------------------------------------------------------|---------------------------------------------------------------------|---------------------------------------------------------------------|---------------------------------------------------------------------|---------------------------------------------------------------------|---------------------------------------------------------------------|---------------------------------------------------------|---------------------------------------------------------------------|--------------------------------------------------------|
|                       | NJB                                                                 | GTB                                                                 | GJ                                                                  | NJB                                                                 | GTB                                                                 | GJ                                                                  | NJB                                                     | GTB                                                                 | GJ                                                     |
| wNAO (DJFM)           | <b>R = 0.67</b><br><b>R<sup>2</sup> = 0.44</b><br><i>p</i> < 0.0001 | <b>R = 0.49</b><br><b>R<sup>2</sup> = 0.24</b><br><i>p</i> = 0.0003 | <b>R = 0.39</b><br><b>R<sup>2</sup> = 0.16</b><br><i>p</i> < 0.0001 | <b>R = 0.70</b><br><b>R<sup>2</sup> = 0.49</b><br><i>p</i> < 0.0001 | <b>R = 0.52</b><br><b>R<sup>2</sup> = 0.27</b><br><i>p</i> < 0.0001 | <b>R = 0.42</b><br><b>R<sup>2</sup> = 0.18</b><br><i>p</i> < 0.0001 | R = -0.18<br>R <sup>2</sup> = 0.03<br><i>p</i> = 0.237  | <b>R = -0.31</b><br><b>R<sup>2</sup> = 0.10</b><br><i>p</i> = 0.034 | R = 0.10<br>R <sup>2</sup> = 0.01<br><i>p</i> = 0.231  |
| wNAO (DJFM) 1947-1991 | <b>R = 0.65</b><br><b>R<sup>2</sup> = 0.43</b><br><i>p</i> < 0.0001 | <b>R = 0.52</b><br><b>R<sup>2</sup> = 0.27</b><br><i>p</i> < 0.0001 | <b>R = 0.60</b><br><b>R<sup>2</sup> = 0.36</b><br><i>p</i> < 0.0001 | <b>R = 0.68</b><br><b>R<sup>2</sup> = 0.46</b><br><i>p</i> < 0.0001 | <b>R = 0.56</b><br><b>R<sup>2</sup> = 0.31</b><br><i>p</i> < 0.0001 | <b>R = 0.65</b><br><b>R<sup>2</sup> = 0.42</b><br><i>p</i> < 0.0001 | R = -0.18<br>R <sup>2</sup> = 0.03<br><i>p</i> = 0.237  | <b>R = -0.31</b><br><b>R<sup>2</sup> = 0.10</b><br><i>p</i> = 0.034 | R = 0.10<br>R <sup>2</sup> = 0.01<br><i>p</i> = 0.231  |
| sNAO (JJA)            | <b>R = 0.38</b><br><b>R<sup>2</sup> = 0.14</b><br><i>p</i> = 0.0097 | <b>R = 0.40</b><br><b>R<sup>2</sup> = 0.16</b><br><i>p</i> = 0.0046 | <b>R = 0.20</b><br><b>R<sup>2</sup> = 0.04</b><br><i>p</i> = 0.0237 | <b>R = 0.29</b><br><b>R<sup>2</sup> = 0.09</b><br><i>p</i> = 0.0491 | <b>R = 0.34</b><br><b>R<sup>2</sup> = 0.11</b><br><i>p</i> = 0.0193 | R = 0.02<br>R <sup>2</sup> = 0.00<br><i>p</i> = 0.8111              | R = 0.12<br>R <sup>2</sup> = 0.01<br><i>p</i> = 0.431   | R = 0.01<br>R <sup>2</sup> = 0.00<br><i>p</i> = 0.936               | R = 0.03<br>R <sup>2</sup> = 0.00<br><i>p</i> = 0.691  |
| sNAO (JJA) 1947-1991  | <b>R = 0.36</b><br><b>R<sup>2</sup> = 0.13</b><br><i>p</i> = 0.0143 | <b>R = 0.40</b><br><b>R<sup>2</sup> = 0.16</b><br><i>p</i> = 0.0069 | <b>R = 0.38</b><br><b>R<sup>2</sup> = 0.14</b><br><i>p</i> = 0.0116 | R = 0.27<br>R <sup>2</sup> = 0.07<br><i>p</i> = 0.0734              | <b>R = 0.32</b><br><b>R<sup>2</sup> = 0.10</b><br><i>p</i> = 0.0321 | R = 0.26<br>R <sup>2</sup> = 0.07<br><i>p</i> = 0.0864              | R = 0.12<br>R <sup>2</sup> = 0.01<br><i>p</i> = 0.431   | R = 0.01<br>R <sup>2</sup> = 0.00<br><i>p</i> = 0.936               | R = 0.03<br>R <sup>2</sup> = 0.00<br><i>p</i> = 0.691  |
| SGI                   |                                                                     |                                                                     |                                                                     |                                                                     |                                                                     |                                                                     | R = -0.28<br>R <sup>2</sup> = 0.08<br><i>p</i> = 0.0634 | R = -0.23<br>R <sup>2</sup> = 0.05<br><i>p</i> = 0.1161             | R = 0.09<br>R <sup>2</sup> = 0.01<br><i>p</i> = 0.2333 |
| SGI 1947-1991         |                                                                     |                                                                     |                                                                     |                                                                     |                                                                     |                                                                     | R = -0.27<br>R <sup>2</sup> = 0.07<br><i>p</i> = 0.0699 | R = -0.22<br>R <sup>2</sup> = 0.05<br><i>p</i> = 0.5038             | R = 0.10<br>R <sup>2</sup> = 0.01<br><i>p</i> = 0.5144 |

825

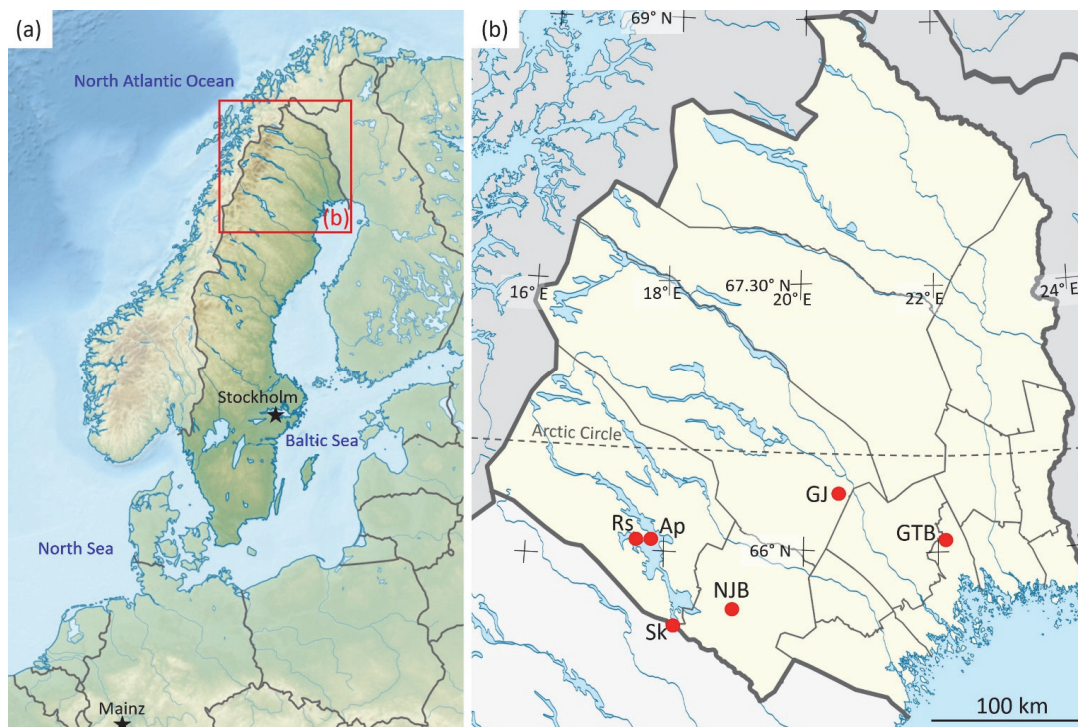

830 Figure 1: Maps showing sample sites in northern Sweden. (a) Topographic map of Scandinavia. (b) Enlargement of red box in (a) showing Norrbottens län (yellow), a province in northern Sweden, and localities where bivalve shells (*Margaritifera margaritifera*) were collected and isotopes in rivers and precipitation were measured. Shell collection sites: NJB = Nuortejaurbäcken, GTB = Grundträsktjärnbäcken, GJ = Görjeån; GNIR site: Sk = River Skellefteälven near Slagnäs; GNIP sites: Rs = Racksund and Ap = Arjeplog. Basemap of A is by TUBS and used under Creative Commons: [https://commons.wikimedia.org/wiki/File:Sweden\\_in\\_Europe\\_\(relief\).svg](https://commons.wikimedia.org/wiki/File:Sweden_in_Europe_(relief).svg). Basemap of B is by Erik Frohne (redrawn by Silverkey) and used under Creative Commons: [https://commons.wikimedia.org/wiki/File:Sweden\\_Norrbotten\\_location\\_map.svg](https://commons.wikimedia.org/wiki/File:Sweden_Norrbotten_location_map.svg).

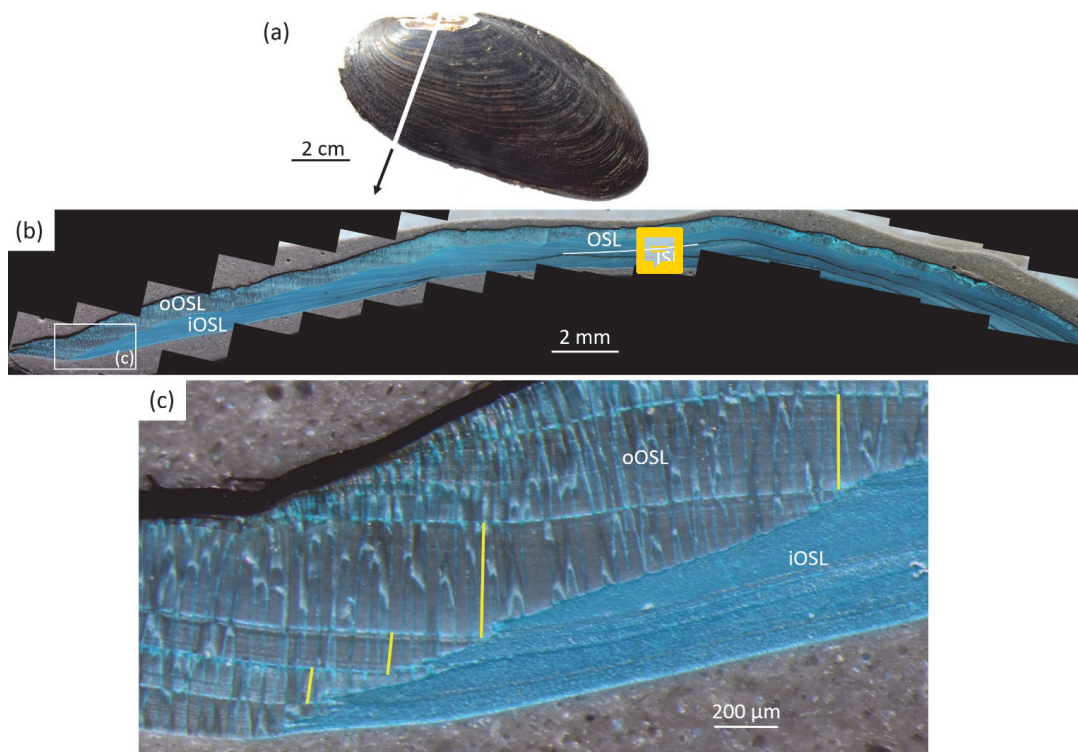

835 Figure 2: Sclerochronological analysis of *Margaritifera margaritifera*. (a) Left valve of a freshwater pearl mussel. Cutting axis is  
indicated with white line. (b) Mutvei-immersed shell slab showing the outer and inner shell  
layers (OSL, ISL) separated by the myostracum (white line). The OSL is further subdivided into an outer and inner portion (oOSL,  
840 iOSL). ISL and iOSL consist of nacreous ultrastructure, the oOSL of prismatic ultrastructure. (c) Enlargement of B shows annual  
growth patterns. Annual increment width measurements (yellow) were completed as perpendiculars from the intersection of the  
oOSL and iOSL toward the next annual growth line.

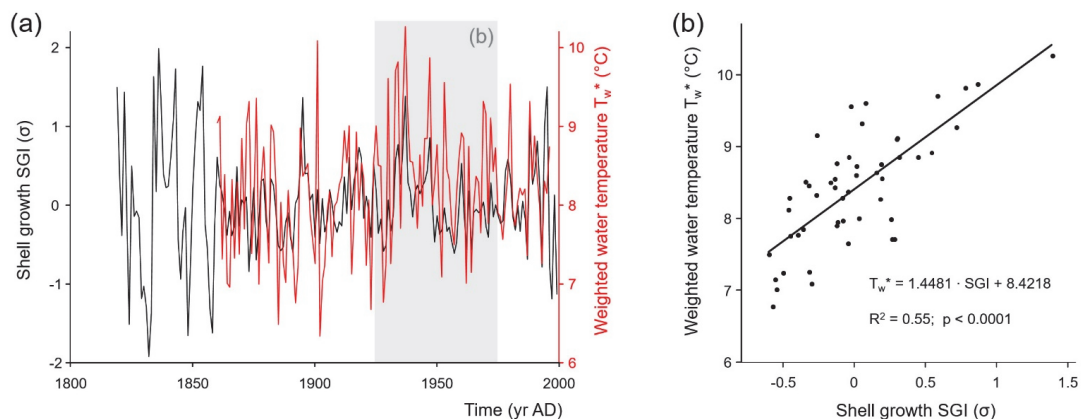

845 **Figure 3: Age-detrended and standardized annual shell growth rate (SGI values) and water temperature during the main growing season (23 May–12 October). (a) Time-series; (b) Cross-plot. Water temperatures were computed from monthly air temperature data using a published transfer function and considering seasonally varying rates of shell growth. Grey box in (a) denotes 50-year calibration interval from which the temperature model (b) was constructed. As seen from the cross-plot in (b), 55 % of the variations in annual shell growth was highly significantly explained by water temperature. Higher temperature resulted in faster shell growth.**



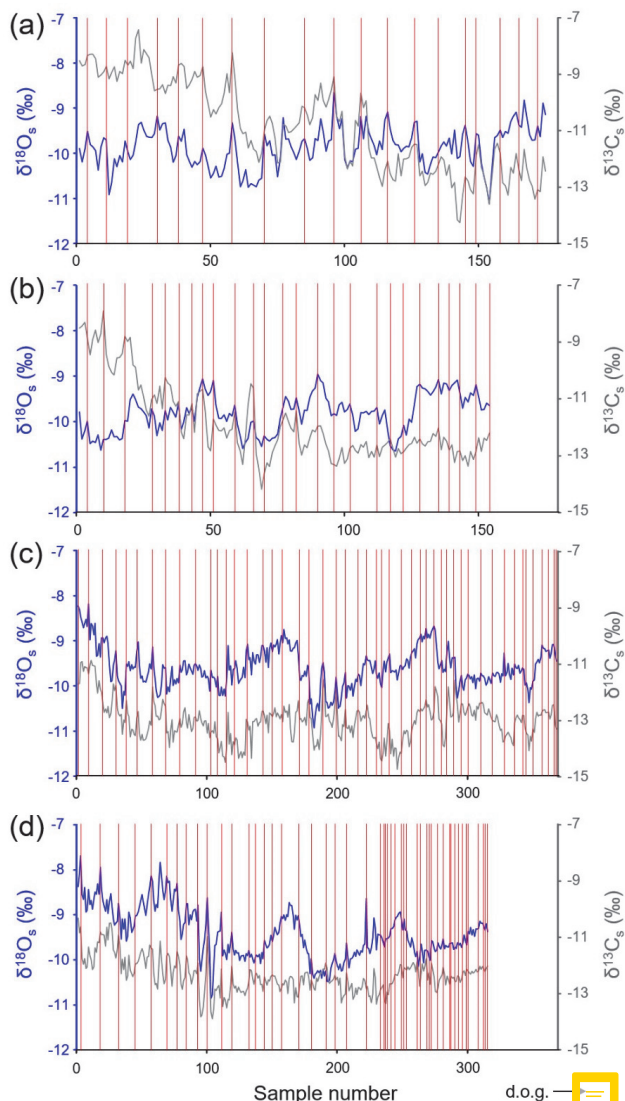

850 **Figure 4:** Shell stable oxygen and carbon isotope chronologies from 2000 selected specimens of *Margaritifera margaritifera* from  
Nuortejaurbäcken and Grundträsktjärnbäcken that were sampled with very high spatial resolution. Individual isotope samples  
represent time intervals of a little as six days to two weeks in ontogenetically young shell portions and up to one full growing season  
in the last few years of life. Red vertical lines stand for annual growth lines. (a): ED-NJB-A6R; (b) ED-NJB-A4R; (c) ED-GTB-A1R;  
855 (d) ED-GTB-A2R. Since the umbral shell portions are corroded, the exact ontogenetic age at which the chronologies start cannot  
and in (d) in year thirteen. See also Table 1.

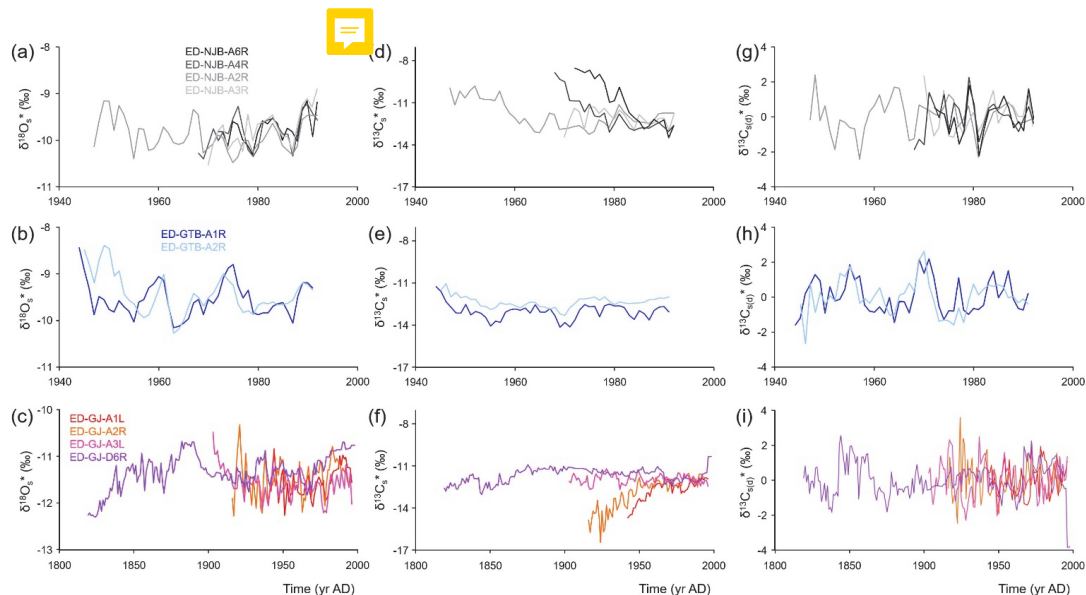

860

**Figure 5:** Annual shell stable oxygen and carbon isotope chronologies of the studied specimens of *Margaritifera margaritifera*. Data were computed as weighted averages from intra-annual isotope data, i.e., growth rate-related variations were taken into consideration. First row (a, d, g) = river Nuortejaurbäcken; second row (b, e, h) = Grundträsktjärnbäcken; third row (c, f, i) = Görjeån. (a-c) = oxygen isotopes; (d-f) = carbon isotopes; (g-i) = Detrended and standardized carbon isotopes.

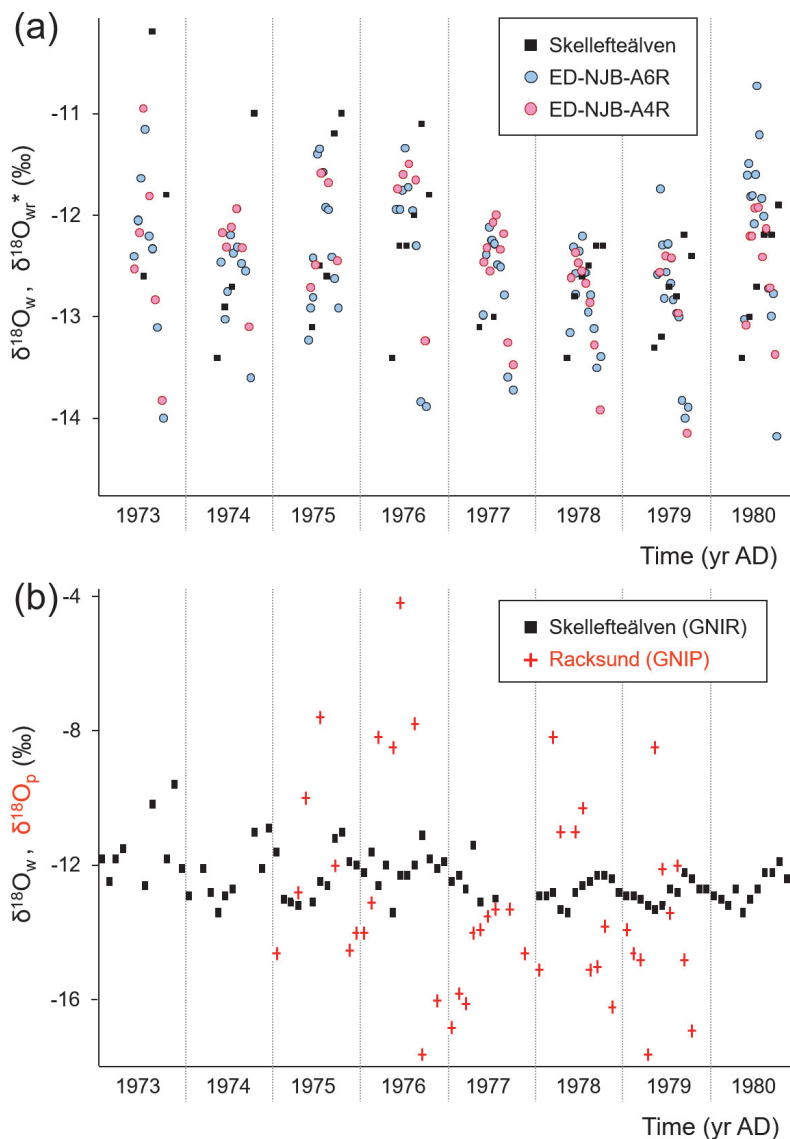

865 **Figure 6: Intra-annual stable oxygen isotope values (1973–1980).** (a) Monthly isotopes measured in the river Skellefteälven (May–Oct) and weighted seasonal averages ( $\delta^{18}O_w^*$ ) of two shells (*Margaritifera margaritifera*) from Nuortejaurbäcken (see Fig. 1). Note good agreement of level and seasonal ranges of instrumental and reconstructed oxygen isotope data as well as similar inter-annual changes. (b) Comparison of monthly oxygen isotope data in stream water (river Skellefteälven; May–Oct) and precipitation (Racksund; whole year).



870

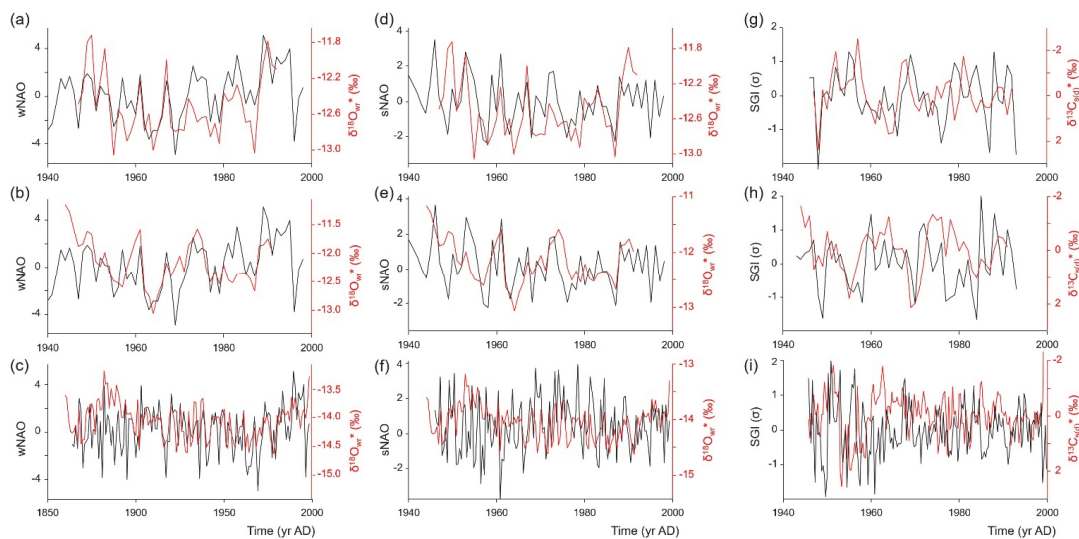

**Figure 7:** Site-specific weighted annual  $\delta^{18}\text{O}_{\text{wr}}^*$  (a-f) and  $\delta^{18}\text{C}_{\text{s(d)}}^*$  (g-i) curves of *Margaritifera margaritifera* compared to the winter (a-c) and summer (d-f) North Atlantic Oscillation indices as well as detrended and standardized shell growth rate (g-i). (a, d, g) = Nuortejaurbäcken; (b, e, h) = Grundträsktjärnbäcken; (c, f, i) = Görjeån.

875

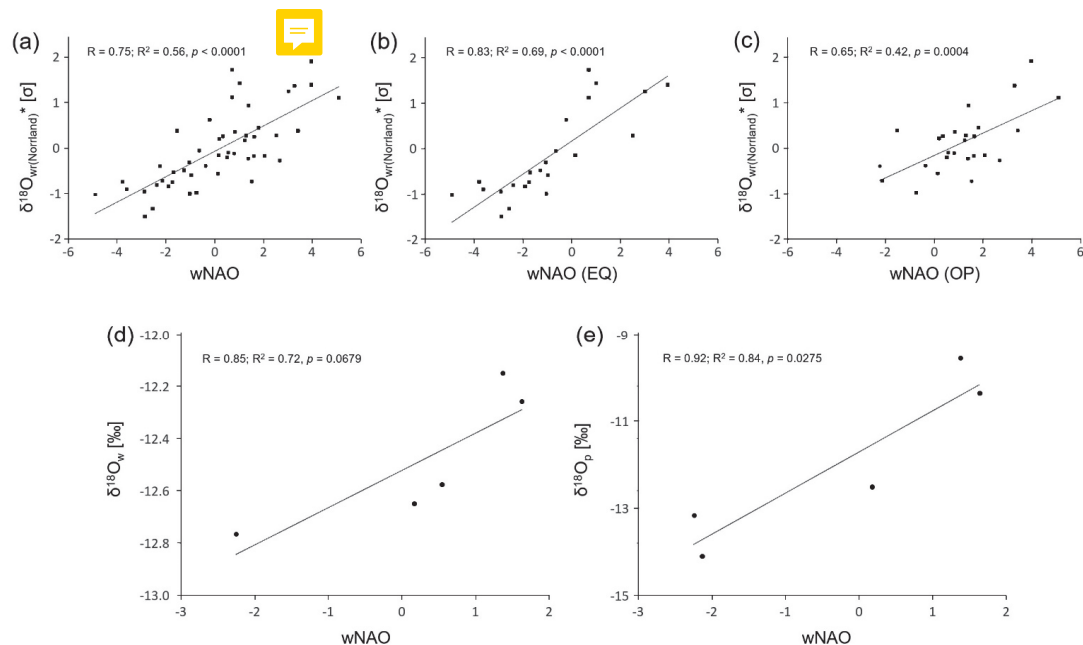

880 **Figure 8: Oxygen isotope data compared to winter NAO index. (a)** Standardized  $\delta^{18}\text{O}_{\text{wrt}}^*$  chronology of the study region compared to the winter NAO index between 1950 and 1998. **(b)** Same as in (a), but only when the East Atlantic Pattern (EA) index has the same sign (EQ) as the winter NAO. **(c)** Same as in A, but only for cases when the EA index is in the opposite (OP) mode than the winter NAO. **(d)**  $\delta^{18}\text{O}_w$  of the river Skelleteälven (during the growing season of the mussels: May–Oct) in comparison to the winter NAO index (1975–1980). **(e)**  $\delta^{18}\text{O}$  of precipitation (Dec–Sep) measured at Racksund in comparison to the winter NAO index (1975–1979).
